# Supplementary material for: The Cii-care Framework: A Contextual Adaptation and Validation of Entrecomp for Intrapreneurial and Innovative Competencies in Healthcare- a Mixed-methods Study in Flanders
Source: Research Square preprint supplement (doi:10.21203/rs.3.rs-6047635/v1), 2025-11-10
Supplement: Supplementary file 1 [file 309d6758b9b68c6f7812b36f.docx]

# **Competency Framework for Innovative Behaviour in Healthcare Professionals**

**Modified Delphi & Nominal Group Technique**

This method aims to reach consensus regarding the competencies and indicators related to innovative behaviour in healthcare professionals.

##### **Main Questions**

For each competency and corresponding indicators, you are asked to rate, using a 6-point Likert scale, whether the wording is suitable for measuring innovative behaviour and entrepreneurship within a healthcare organisation:
1 = not at all suitable, 2 = slightly suitable, 3 = somewhat suitable, 4 = suitable, 5 = very suitable, 6 = completely suitable.

The second main question asks whether you find the wording sufficiently concrete and assessable, also rated on a 6-point Likert scale:
1 = completely insufficient, 2 = insufficient, 3 = barely sufficient, 4 = sufficient, 5 = more than sufficient, 6 = fully sufficient.

For further information regarding the structure and content of the competency framework, please refer to the supporting documents sent via email.

## Demographic Data

**Gender:**
☐ Male
☐ Female
☐ Other

**Age:**
☐ 21-30 years
☐ 31-40 years
☐ 41-50 years
☐ 51-60 years
☐ > 60 years

**Scientific Experience:**
☐ 0-5 years
☐ 6-10 years
☐ 11-15 years
☐ 16-20 years
☐ 21-25 years
☐ > 25 years

**Experience in Healthcare:**
☐ 0-5 years
☐ 6-10 years
☐ 11-15 years
☐ 16-20 years
☐ 21-25 years
☐ > 25 years

# **Cluster: Ideas and Opportunities**

## ****Competency: Spotting Opportunities****

This competency involves identifying, creating, and seizing opportunities, needs, and challenges within the work environment. Defining problems and analysing the context are integral to this.

### Subcompetency: Identifying, creating, and spotting opportunities, needs, and challenges

##### **Indicators per level**

**Foundation:** I recognise opportunities, needs, and challenges within my work environment.

**Intermediate:** I proactively seek opportunities that create added value, redefine challenges, and determine who should be involved in addressing needs and challenges.

**Advanced:** I have knowledge and understanding of my work environment (including potentially conflicting interests among stakeholders) to seize opportunities at the right time.

**Expert:** I cluster different opportunities, identify the best one, develop an action plan, and design projects that anticipate future needs.

##### **Evaluation Questions**

To what extent do you find the wording of this competency and its indicators suitable for measuring innovative behaviour and entrepreneurship within a healthcare organisation?

| 1 | 2 | 3 | 4 | 5 | 6 |
| --- | --- | --- | --- | --- | --- |

To what extent do you find the wording sufficiently concrete and assessable?

| 1 | 2 | 3 | 4 | 5 | 6 |
| --- | --- | --- | --- | --- | --- |

To what extent do you find the wording acceptable?

| 1 | 2 | 3 | 4 | 5 | 6 |
| --- | --- | --- | --- | --- | --- |

Alternative suggestions to improve concreteness, assessability, acceptability, and suitability:
[Open text field]

### Subcompetency : problem difinition

##### **Indicators per level**

**Foundation:** I explore problems in various ways to generate multiple solutions.

**Intermediate:** I participate in group processes to define and transform open problems.

**Advanced:** I encourage others to contribute to added value in projects by using creative techniques to shape solutions for open problems.

**Expert:** [Not specified]

##### **Evaluation Questions**

To what extent do you find the wording of this competency and its indicators suitable for measuring innovative behaviour and entrepreneurship within a healthcare organisation?

| 1 | 2 | 3 | 4 | 5 | 6 |
| --- | --- | --- | --- | --- | --- |

To what extent do you find the wording sufficiently concrete and assessable?

| 1 | 2 | 3 | 4 | 5 | 6 |
| --- | --- | --- | --- | --- | --- |

To what extent do you find the wording acceptable?

| 1 | 2 | 3 | 4 | 5 | 6 |
| --- | --- | --- | --- | --- | --- |

Alternative suggestions to improve concreteness, assessability, acceptability, and suitability:
[Open text field]

### Subcompetency : analyzing the context

##### **Indicators per level**

**Foundation:** I describe the differences between micro, meso, and macro levels in terms of the value being created.

**Intermediate:** I position my value-creating activity within the micro, meso, and macro levels of my work environment.

**Advanced:** I determine the relevant organizational boundaries and see further development opportunities for value-creating activities within those boundaries.

**Expert:** I foster a work environment culture that is receptive to detecting even weak signals for change.

##### **Evaluation Questions**

To what extent do you find the wording of this competency and its indicators suitable for measuring innovative behaviour and entrepreneurship within a healthcare organisation?

| 1 | 2 | 3 | 4 | 5 | 6 |
| --- | --- | --- | --- | --- | --- |

To what extent do you find the wording sufficiently concrete and assessable?

| 1 | 2 | 3 | 4 | 5 | 6 |
| --- | --- | --- | --- | --- | --- |

To what extent do you find the wording acceptable?

| 1 | 2 | 3 | 4 | 5 | 6 |
| --- | --- | --- | --- | --- | --- |

Alternative suggestions to improve concreteness, assessability, acceptability, and suitability:
[Open text field]

## ****Competency: Creativity****

This competency involves being curious and open, generating ideas, recognising the added value of ideas and prototypes, and being innovative.

### **Subcompetency: Being Curious and Open Minded**

##### **Indicators per level**

**Foundation:** I explore new ways to use existing resources and enhance my knowledge.

**Intermediate:** I experiment with my skills and actively seek new solutions for my own and my work environment’s needs.

**Advanced:** I actively seek new solutions that enhance the value creation process.

**Expert:** I share knowledge, ideas, and solutions across different contexts.

##### **Evaluation Questions**

To what extent do you find the wording of this competency and its indicators suitable for measuring innovative behaviour and entrepreneurship within a healthcare organisation?

| 1 | 2 | 3 | 4 | 5 | 6 |
| --- | --- | --- | --- | --- | --- |

To what extent do you find the wording sufficiently concrete and assessable?

| 1 | 2 | 3 | 4 | 5 | 6 |
| --- | --- | --- | --- | --- | --- |

To what extent do you find the wording acceptable?

| 1 | 2 | 3 | 4 | 5 | 6 |
| --- | --- | --- | --- | --- | --- |

Alternative suggestions to improve concreteness, assessability, acceptability, and suitability:
[Open text field]

### **Subcompetency: Generating Ideas**

##### **Indicators per level**

**Foundation:** I draw inspiration from others’ ideas and consider how they could be relevant to me.

**Intermediate:** I develop ideas (individually and collaboratively) that create added value for my work environment.

**Advanced:** I experiment with different techniques to arrive at alternative solutions and test these ideas with end users.

**Expert:** [Not specified]

##### **Evaluation Questions**

To what extent do you find the wording of this competency and its indicators suitable for measuring innovative behaviour and entrepreneurship within a healthcare organisation?

| 1 | 2 | 3 | 4 | 5 | 6 |
| --- | --- | --- | --- | --- | --- |

To what extent do you find the wording sufficiently concrete and assessable?

| 1 | 2 | 3 | 4 | 5 | 6 |
| --- | --- | --- | --- | --- | --- |

To what extent do you find the wording acceptable?

| 1 | 2 | 3 | 4 | 5 | 6 |
| --- | --- | --- | --- | --- | --- |

Alternative suggestions to improve concreteness, assessability, acceptability, and suitability:
[Open text field]

### **Subcompetency: Understanding the value of the prototype**

##### **Indicators per level**

**Foundation:** I identify and improve existing ideas, services, products, and processes to better meet my needs and those of my work environment.

**Intermediate:** I identify, test, and refine the basic functions my prototype must have to demonstrate its value.

**Advanced:** I create (individually or with others) ideas, services, products, and/or processes that solve my problems and develop added value.

**Expert:** [Not specified]

##### **Evaluation Questions**

To what extent do you find the wording of this competency and its indicators suitable for measuring innovative behaviour and entrepreneurship within a healthcare organisation?

| 1 | 2 | 3 | 4 | 5 | 6 |
| --- | --- | --- | --- | --- | --- |

To what extent do you find the wording sufficiently concrete and assessable?

| 1 | 2 | 3 | 4 | 5 | 6 |
| --- | --- | --- | --- | --- | --- |

To what extent do you find the wording acceptable?

| 1 | 2 | 3 | 4 | 5 | 6 |
| --- | --- | --- | --- | --- | --- |

Alternative suggestions to improve concreteness, assessability, acceptability, and suitability:
[Open text field]

### **Subcompetency: Being innovative**

##### **Indicators per level**

**Foundation:** I describe and find examples of innovations that have changed my work environment.

**Intermediate:** I recognise different types of innovations and become aware of whether an idea, product, or process is truly innovative or just new to me.

**Advanced:** I describe different levels of innovation and their role in value creation, and I understand how these innovations spread within my work environment.

**Expert:** I encourage others to create added value through new ideas, services, products, or processes.

##### **Evaluation Questions**

To what extent do you find the wording of this competency and its indicators suitable for measuring innovative behaviour and entrepreneurship within a healthcare organisation?

| 1 | 2 | 3 | 4 | 5 | 6 |
| --- | --- | --- | --- | --- | --- |

To what extent do you find the wording sufficiently concrete and assessable?

| 1 | 2 | 3 | 4 | 5 | 6 |
| --- | --- | --- | --- | --- | --- |

To what extent do you find the wording acceptable?

| 1 | 2 | 3 | 4 | 5 | 6 |
| --- | --- | --- | --- | --- | --- |

Alternative suggestions to improve concreteness, assessability, acceptability, and suitability:
[Open text field]

## Competency : Vision

This competency involves using imagination to visualise a future scenario and subsequently applying strategic thinking to turn that vision into reality.

### Subcompetency : Using imagination

##### Indicators per level

**Foundation:** I develop simple future scenarios where my work environment looks different/better.

**Intermediate:** I can imagine future scenarios for my value-creating activity.

**Advanced:** I use my understanding of the context to identify different strategic visions for my value-creating activity.

**Expert:** I demonstrate the benefits of my future scenarios to different target audiences.

##### **Evaluation Questions**

To what extent do you find the wording of this competency and its indicators suitable for measuring innovative behaviour and entrepreneurship within a healthcare organisation?

| 1 | 2 | 3 | 4 | 5 | 6 |
| --- | --- | --- | --- | --- | --- |

To what extent do you find the wording sufficiently concrete and assessable?

| 1 | 2 | 3 | 4 | 5 | 6 |
| --- | --- | --- | --- | --- | --- |

To what extent do you find the wording acceptable?

| 1 | 2 | 3 | 4 | 5 | 6 |
| --- | --- | --- | --- | --- | --- |

Alternative suggestions to improve concreteness, assessability, acceptability, and suitability:
[Open text field]

### Subcompetency : Strategic thinking

Indicators per level:

**Foundation:** i explain what a vision is and what its purpose is

**Intermediate:** i know what is needed to build a vision and i can link concrete examples from my work environment to it

**Advanced:** i draft a vision statement for my value-creating activity based on a context analysis (and align it with the vision of my work environment) and i use this to take action

**Expert:** i start from the established vision to determine and achieve a strategy for my value-creating activity and i actively involve others in the process

##### **Evaluation Questions**

To what extent do you find the wording of this competency and its indicators suitable for measuring innovative behaviour and entrepreneurship within a healthcare organisation?

| 1 | 2 | 3 | 4 | 5 | 6 |
| --- | --- | --- | --- | --- | --- |

To what extent do you find the wording sufficiently concrete and assessable?

| 1 | 2 | 3 | 4 | 5 | 6 |
| --- | --- | --- | --- | --- | --- |

To what extent do you find the wording acceptable?

| 1 | 2 | 3 | 4 | 5 | 6 |
| --- | --- | --- | --- | --- | --- |

Alternative suggestions to improve concreteness, assessability, acceptability, and suitability:
[Open text field]

## Competency : Valuing ideas

This competency involves optimally using ideas and opportunities and assessing their value in social, cultural, and economic terms.

Indicators per level

**Foundation:** I understand the concept of 'added value' and recognise how others create added value for my work environment.

**Intermediate:** I see the difference between social, cultural, and economic added value.

**Advanced:** I see the impact and added value of my value-creating activity on social, cultural, and economic levels.

**Expert:** I explain the value of a new idea from the perspective of the different stakeholders.

##### **Evaluation Questions**

To what extent do you find the wording of this competency and its indicators suitable for measuring innovative behaviour and entrepreneurship within a healthcare organisation?

| 1 | 2 | 3 | 4 | 5 | 6 |
| --- | --- | --- | --- | --- | --- |

To what extent do you find the wording sufficiently concrete and assessable?

| 1 | 2 | 3 | 4 | 5 | 6 |
| --- | --- | --- | --- | --- | --- |

To what extent do you find the wording acceptable?

| 1 | 2 | 3 | 4 | 5 | 6 |
| --- | --- | --- | --- | --- | --- |

Alternative suggestions to improve concreteness, assessability, acceptability, and suitability:
[Open text field]

## ****Competency: Ethical and sustainable thinking****

This competency involves assessing the consequences and impact of ideas, opportunities, and actions, and evaluating their effect on social, cultural, and economic levels.

### **Subcompetency: Ethical behaviour**

Indicators per level

**Foundation:** I understand the concepts of integrity, honesty, responsibility, courage, and engagement, and I can explain the importance of behaviour that reflects these concepts.

**Intermediate:** I am driven by honesty and integrity when making decisions.

**Advanced:** I ensure that ideas for a value-creating activity are supported by ethics and values related to gender, equality, fairness, social justice, and environmental sustainability.

**Expert:** I take responsibility for promoting ethical behaviour within my sphere of influence and take action against unethical behaviour.

##### **Evaluation Questions**

To what extent do you find the wording of this competency and its indicators suitable for measuring innovative behaviour and entrepreneurship within a healthcare organisation?

| 1 | 2 | 3 | 4 | 5 | 6 |
| --- | --- | --- | --- | --- | --- |

To what extent do you find the wording sufficiently concrete and assessable?

| 1 | 2 | 3 | 4 | 5 | 6 |
| --- | --- | --- | --- | --- | --- |

To what extent do you find the wording acceptable?

| 1 | 2 | 3 | 4 | 5 | 6 |
| --- | --- | --- | --- | --- | --- |

Alternative suggestions to improve concreteness, assessability, acceptability, and suitability:
[Open text field]

### Subcompetency : Thinking sustainable

Indicators per level
**Foundation:** I understand the concept of sustainability.
**Intermediate:** I identify practices that can promote sustainability in my work environment.
**Advanced:** I implement elements of sustainability in my value-creating activity.
**Expert:** I encourage consideration of sustainability in every new value-creating activity.

##### **Evaluation Questions**

To what extent do you find the wording of this competency and its indicators suitable for measuring innovative behaviour and entrepreneurship within a healthcare organisation?

| 1 | 2 | 3 | 4 | 5 | 6 |
| --- | --- | --- | --- | --- | --- |

To what extent do you find the wording sufficiently concrete and assessable?

| 1 | 2 | 3 | 4 | 5 | 6 |
| --- | --- | --- | --- | --- | --- |

To what extent do you find the wording acceptable?

| 1 | 2 | 3 | 4 | 5 | 6 |
| --- | --- | --- | --- | --- | --- |

Alternative suggestions to improve concreteness, assessability, acceptability, and suitability:
[Open text field]

### Subcompetency : Evaluating the impact

Indicators per level
**Foundation:** I recognise the effect of a value-creating activity within my work environment and identify the stakeholders involved.
**Intermediate:** I describe the effect of a value-creating activity on myself, my work environment, the involved stakeholders, and the target group.
**Advanced:** I analyse the implications of my value-creating activity within the boundaries of my work environment and describe the purpose of impact assessment and monitoring.
**Expert:** I select measurement indicators to monitor, assess, and evaluate the impact of my value-creating activity.

##### **Evaluation Questions**

To what extent do you find the wording of this competency and its indicators suitable for measuring innovative behaviour and entrepreneurship within a healthcare organisation?

| 1 | 2 | 3 | 4 | 5 | 6 |
| --- | --- | --- | --- | --- | --- |

To what extent do you find the wording sufficiently concrete and assessable?

| 1 | 2 | 3 | 4 | 5 | 6 |
| --- | --- | --- | --- | --- | --- |

To what extent do you find the wording acceptable?

| 1 | 2 | 3 | 4 | 5 | 6 |
| --- | --- | --- | --- | --- | --- |

Alternative suggestions to improve concreteness, assessability, acceptability, and suitability:
[Open text field]

# Cluster: Resources

## Competency : Self-awareness and self-efficacy

This competency involves identifying strengths and areas for development in yourself and others, believing in your own abilities, and actively shaping your future.

### **Subcompetency: Identifying strengths and growth areas**

Indicators per level
**Foundation:** I know what I am good at and where I am less skilled.
**Intermediate:** I assess my own and others’ strengths and areas for development in relation to opportunities to create added value.
**Advanced:** I collaborate with others to compensate for my areas for development and to strengthen our collective abilities.
**Expert:** I help others identify their strengths and areas for development.

##### **Evaluation Questions**

To what extent do you find the wording of this competency and its indicators suitable for measuring innovative behaviour and entrepreneurship within a healthcare organisation?

| 1 | 2 | 3 | 4 | 5 | 6 |
| --- | --- | --- | --- | --- | --- |

To what extent do you find the wording sufficiently concrete and assessable?

| 1 | 2 | 3 | 4 | 5 | 6 |
| --- | --- | --- | --- | --- | --- |

To what extent do you find the wording acceptable?

| 1 | 2 | 3 | 4 | 5 | 6 |
| --- | --- | --- | --- | --- | --- |

Alternative suggestions to improve concreteness, assessability, acceptability, and suitability:
[Open text field]

### Subcompetency : Belief in oneself

Indicators per level
**Foundation:** I believe in my ability to achieve what I intend to do.
**Intermediate:** I believe that I can positively influence people and situations, and I assess the extent of control I have over them.
**Advanced:** I believe in my ability to extract value from experiences that others might label as failures.
**Expert:** I believe in my ability to carry out what I have planned, despite obstacles, limited resources, and resistance from others.

##### **Evaluation Questions**

To what extent do you find the wording of this competency and its indicators suitable for measuring innovative behaviour and entrepreneurship within a healthcare organisation?

| 1 | 2 | 3 | 4 | 5 | 6 |
| --- | --- | --- | --- | --- | --- |

To what extent do you find the wording sufficiently concrete and assessable?

| 1 | 2 | 3 | 4 | 5 | 6 |
| --- | --- | --- | --- | --- | --- |

To what extent do you find the wording acceptable?

| 1 | 2 | 3 | 4 | 5 | 6 |
| --- | --- | --- | --- | --- | --- |

Alternative suggestions to improve concreteness, assessability, acceptability, and suitability:
[Open text field]

### Subcompetency : Shaping your future and follow your expectations

Indicators per level
**Foundation:** I describe which qualities and skills are needed for various job-related roles now and in the future, and which qualities and skills I possess myself.
**Intermediate:** I use my skills and qualities to identify opportunities within my role.
**Advanced:** Together with my team and organisation, I select professional development opportunities based on a clear understanding of our strengths and weaknesses.
**Expert:** I design strategies to overcome my weaknesses (or those of my organisation and my team) and to develop our strengths by anticipating future needs.

##### **Evaluation Questions**

To what extent do you find the wording of this competency and its indicators suitable for measuring innovative behaviour and entrepreneurship within a healthcare organisation?

| 1 | 2 | 3 | 4 | 5 | 6 |
| --- | --- | --- | --- | --- | --- |

To what extent do you find the wording sufficiently concrete and assessable?

| 1 | 2 | 3 | 4 | 5 | 6 |
| --- | --- | --- | --- | --- | --- |

To what extent do you find the wording acceptable?

| 1 | 2 | 3 | 4 | 5 | 6 |
| --- | --- | --- | --- | --- | --- |

Alternative suggestions to improve concreteness, assessability, acceptability, and suitability:
[Open text field]

## Competency : Motivation and perseverance

This competency involves staying focused and determined to turn ideas into action.

### **Subcompetency : Stay motivated and focus on what drives you**

Indicators per level
**Foundation:** I am motivated by the idea of creating value for myself and others.
**Intermediate:** I see the difference between personal and external factors that motivate me and others in value-creating activities.
**Advanced:** I coach and apply strategies to keep myself and others motivated.
**Expert:** I develop effective ways to keep talented people inspired and motivated, fostering a continuous cycle of improvement and innovation.

##### **Evaluation Questions**

To what extent do you find the wording of this competency and its indicators suitable for measuring innovative behaviour and entrepreneurship within a healthcare organisation?

| 1 | 2 | 3 | 4 | 5 | 6 |
| --- | --- | --- | --- | --- | --- |

To what extent do you find the wording sufficiently concrete and assessable?

| 1 | 2 | 3 | 4 | 5 | 6 |
| --- | --- | --- | --- | --- | --- |

To what extent do you find the wording acceptable?

| 1 | 2 | 3 | 4 | 5 | 6 |
| --- | --- | --- | --- | --- | --- |

Alternative suggestions to improve concreteness, assessability, acceptability, and suitability:
[Open text field]

### Subcompetency : Be resilient and persevering

Indicators per level
**Foundation:** I show passion, determination, and perseverance when trying to achieve my goals.
**Intermediate:** I dare to fail and assess whether or not it is worthwhile to continue a value-creating activity.
**Advanced:** I develop strategies to overcome unfavourable conditions, persevere through setbacks to achieve my goals, and celebrate short-term successes.
**Expert:** I encourage others to stay positive when making difficult decisions and when dealing with failures.

## Competency : Developing financial and economic knowledge

This competency involves managing the budget for the value-creating activity and securing funds to turn ideas into action.

### **Subcompetency : Managing budget**

Indicators per level
**Foundation:** I responsibly create a simple budget for my value-creating activity.
**Intermediate:** I assess the incoming and outgoing cash flows of a value-creating activity in consultation with financial experts.
**Advanced:** I work with financial experts to develop financial indicators to assess the financial health of my value-creating activity.
**Expert:** In consultation with experts, I develop a financially and economically sustainable long-term plan for my value-creating activity.

##### **Evaluation Questions**

To what extent do you find the wording of this competency and its indicators suitable for measuring innovative behaviour and entrepreneurship within a healthcare organisation?

| 1 | 2 | 3 | 4 | 5 | 6 |
| --- | --- | --- | --- | --- | --- |

To what extent do you find the wording sufficiently concrete and assessable?

| 1 | 2 | 3 | 4 | 5 | 6 |
| --- | --- | --- | --- | --- | --- |

To what extent do you find the wording acceptable?

| 1 | 2 | 3 | 4 | 5 | 6 |
| --- | --- | --- | --- | --- | --- |

Alternative suggestions to improve concreteness, assessability, acceptability, and suitability:
[Open text field]

### Subcompetency : Fundraising

### Indicators per level **Foundation:** I am aware of the existence of grant channels and funding sources for value-creating activities. **Intermediate:** I identify, in consultation with the financial expert, the public and private funding sources that may be needed to implement my value-creating activity. **Advanced:** I select, in consultation with the financial expert, the most suitable funding source for my value-creating activity. **Expert:** I am able to apply for funding through public and private support programmes and grants in collaboration with an expert, and I know who to contact within my organisation for this purpose.

##### **Evaluation Questions**

To what extent do you find the wording of this competency and its indicators suitable for measuring innovative behaviour and entrepreneurship within a healthcare organisation?

| 1 | 2 | 3 | 4 | 5 | 6 |
| --- | --- | --- | --- | --- | --- |

To what extent do you find the wording sufficiently concrete and assessable?

| 1 | 2 | 3 | 4 | 5 | 6 |
| --- | --- | --- | --- | --- | --- |

To what extent do you find the wording acceptable?

| 1 | 2 | 3 | 4 | 5 | 6 |
| --- | --- | --- | --- | --- | --- |

Alternative suggestions to improve concreteness, assessability, acceptability, and suitability:
[Open text field]

### Subcompetency : Acquire legal knowledge

Indicators per level
**Foundation:** I am aware that a legal context exists that influences my work environment.
**Intermediate:** I know who within my work environment is responsible for legal matters.
**Advanced:** I collaborate with legal experts to determine how the legal framework influences my value-creating activity.
**Expert:** Not specified

##### **Evaluation Questions**

To what extent do you find the wording of this competency and its indicators suitable for measuring innovative behaviour and entrepreneurship within a healthcare organisation?

| 1 | 2 | 3 | 4 | 5 | 6 |
| --- | --- | --- | --- | --- | --- |

To what extent do you find the wording sufficiently concrete and assessable?

| 1 | 2 | 3 | 4 | 5 | 6 |
| --- | --- | --- | --- | --- | --- |

To what extent do you find the wording acceptable?

| 1 | 2 | 3 | 4 | 5 | 6 |
| --- | --- | --- | --- | --- | --- |

Alternative suggestions to improve concreteness, assessability, acceptability, and suitability:
[Open text field]

## Competency: Mobilising others

This competency involves inspiring, engaging, and getting others on board, inspiring and enthusing stakeholders, and securing the necessary support to achieve results.

### Subcompetency : Inspiring and persuading

Indicators per level
**Foundation**: I am enthusiastic and actively involved in creating value for others, and I can convince others with a few arguments.
**Intermediate**: I do not get discouraged, lead by example, and persuade others by appealing to their emotions.
**Advanced**: I gain approval by effectively pitching my value-creating activity to others and overcoming their resistance.
**Expert**: I form a coalition with my team, partners, and stakeholders when involved in a challenging situation, negotiate, and call for action.

##### **Evaluation Questions**

To what extent do you find the wording of this competency and its indicators suitable for measuring innovative behaviour and entrepreneurship within a healthcare organisation?

| 1 | 2 | 3 | 4 | 5 | 6 |
| --- | --- | --- | --- | --- | --- |

To what extent do you find the wording sufficiently concrete and assessable?

| 1 | 2 | 3 | 4 | 5 | 6 |
| --- | --- | --- | --- | --- | --- |

To what extent do you find the wording acceptable?

| 1 | 2 | 3 | 4 | 5 | 6 |
| --- | --- | --- | --- | --- | --- |

Alternative suggestions to improve concreteness, assessability, acceptability, and suitability:
[Open text field]

### Subcompetency: effectively communicating and using relevant media

Indicators per level:
**Foundation:** I convincingly convey the value of my ideas and those of my team to others using various methods and different media.
**Intermediate:** I effectively communicate the value of my idea to stakeholders with different backgrounds, using appropriate media for each target audience.
**Advanced:** I create stories and scenarios that motivate, inspire, and guide people towards the vision of my value-creating activity, collaborating with others to select appropriate communication strategies and media.
**Expert:** In consultation with a communication expert, I develop a communication strategy to mobilise people around my value-creating activity and to maintain support for my vision.

##### **Evaluation Questions**

To what extent do you find the wording of this competency and its indicators suitable for measuring innovative behaviour and entrepreneurship within a healthcare organisation?

| 1 | 2 | 3 | 4 | 5 | 6 |
| --- | --- | --- | --- | --- | --- |

To what extent do you find the wording sufficiently concrete and assessable?

| 1 | 2 | 3 | 4 | 5 | 6 |
| --- | --- | --- | --- | --- | --- |

To what extent do you find the wording acceptable?

| 1 | 2 | 3 | 4 | 5 | 6 |
| --- | --- | --- | --- | --- | --- |

Alternative suggestions to improve concreteness, assessability, acceptability, and suitability:
[Open text field]

# Cluster: into action

## ****Competency: Taking the initiative****

This competency involves taking responsibility and acting proactively to set up value-creating activities.

### **Subcompetency: Taking responsibility**

Indicators per level
**Foundation:** I take individual responsibility for the tasks I am given.
**Intermediate:** I spontaneously take individual and group responsibility when carrying out simple tasks.
**Advanced:** I take responsibility for complex tasks, encourage others to take responsibility, and share responsibility with them in my value-creating activity.
**Expert:** I take responsibility for complex tasks, for seizing new opportunities, and I encourage others to take initiative within my value-creating activity.

##### **Evaluation Questions**

To what extent do you find the wording of this competency and its indicators suitable for measuring innovative behaviour and entrepreneurship within a healthcare organisation?

| 1 | 2 | 3 | 4 | 5 | 6 |
| --- | --- | --- | --- | --- | --- |

To what extent do you find the wording sufficiently concrete and assessable?

| 1 | 2 | 3 | 4 | 5 | 6 |
| --- | --- | --- | --- | --- | --- |

To what extent do you find the wording acceptable?

| 1 | 2 | 3 | 4 | 5 | 6 |
| --- | --- | --- | --- | --- | --- |

Alternative suggestions to improve concreteness, assessability, acceptability, and suitability:
[Open text field]

### Subcompetency : Acting proactively

Indicators per level
**Foundation:** I try to think in a structured way about possible solutions for simple problems affecting my work environment.
**Intermediate:** I actively take on challenges, solve simple problems, and seize opportunities to create added value within my work environment.
**Advanced:** I take action, solve complex problems, and guide others in acting proactively and developing solutions.
**Expert:** I encourage others to take initiative in solving problems and proactively anticipate future trends and developments relevant to my work environment.

##### **Evaluation Questions**

To what extent do you find the wording of this competency and its indicators suitable for measuring innovative behaviour and entrepreneurship within a healthcare organisation?

| 1 | 2 | 3 | 4 | 5 | 6 |
| --- | --- | --- | --- | --- | --- |

To what extent do you find the wording sufficiently concrete and assessable?

| 1 | 2 | 3 | 4 | 5 | 6 |
| --- | --- | --- | --- | --- | --- |

To what extent do you find the wording acceptable?

| 1 | 2 | 3 | 4 | 5 | 6 |
| --- | --- | --- | --- | --- | --- |

Alternative suggestions to improve concreteness, assessability, acceptability, and suitability:
[Open text field]

## Competency: Planning and management

This competency involves setting goals, working in a structured way, determining priorities, implementing plans, and managing resistance.

### Subcompetency : Setting goals

Indicators per level
**Foundation:** I identify relevant goals to create added value in my work environment.
**Intermediate:** I identify forward-looking goals aligned with my strengths, ambitions, interests, and achievements to create added value within my work environment.
**Advanced:** I set short, medium, and long-term goals that arise from my value-creating activity.
**Expert:** I design a strategy to achieve the goals of my value-creating activity.

##### **Evaluation Questions**

To what extent do you find the wording of this competency and its indicators suitable for measuring innovative behaviour and entrepreneurship within a healthcare organisation?

| 1 | 2 | 3 | 4 | 5 | 6 |
| --- | --- | --- | --- | --- | --- |

To what extent do you find the wording sufficiently concrete and assessable?

| 1 | 2 | 3 | 4 | 5 | 6 |
| --- | --- | --- | --- | --- | --- |

To what extent do you find the wording acceptable?

| 1 | 2 | 3 | 4 | 5 | 6 |
| --- | --- | --- | --- | --- | --- |

Alternative suggestions to improve concreteness, assessability, acceptability, and suitability:
[Open text field]

### Subcompetency : Working in a systematically

Indicators per level
**Foundation:** I carry out a series of tasks and then check whether a task is progressing according to plan.
**Intermediate:** I know the different components of an action plan and understand what milestones and indicators are.
**Advanced:** I create an action plan outlining the necessary steps to achieve my goals and define milestones to monitor the progress of my value-creating activity.
**Expert:** I use the action plan to monitor the established indicators of my value-creating activity.

##### **Evaluation Questions**

To what extent do you find the wording of this competency and its indicators suitable for measuring innovative behaviour and entrepreneurship within a healthcare organisation?

| 1 | 2 | 3 | 4 | 5 | 6 |
| --- | --- | --- | --- | --- | --- |

To what extent do you find the wording sufficiently concrete and assessable?

| 1 | 2 | 3 | 4 | 5 | 6 |
| --- | --- | --- | --- | --- | --- |

To what extent do you find the wording acceptable?

| 1 | 2 | 3 | 4 | 5 | 6 |
| --- | --- | --- | --- | --- | --- |

Alternative suggestions to improve concreteness, assessability, acceptability, and suitability:
[Open text field]

### Subcompetency : Setting priorities

Indicators per level
**Foundation:** I recognise the basic steps needed in a value-creating activity and handle changes constructively.
**Intermediate:** I set priorities to realise the vision of my value-creating activity.
**Advanced:** I prioritise the steps in my value-creating activity and adjust my plans based on contextual factors beyond my control.
**Expert:** I set priorities within my value-creating activity in uncertain circumstances, with partial or ambiguous information.

##### **Evaluation Questions**

To what extent do you find the wording of this competency and its indicators suitable for measuring innovative behaviour and entrepreneurship within a healthcare organisation?

| 1 | 2 | 3 | 4 | 5 | 6 |
| --- | --- | --- | --- | --- | --- |

To what extent do you find the wording sufficiently concrete and assessable?

| 1 | 2 | 3 | 4 | 5 | 6 |
| --- | --- | --- | --- | --- | --- |

To what extent do you find the wording acceptable?

| 1 | 2 | 3 | 4 | 5 | 6 |
| --- | --- | --- | --- | --- | --- |

Alternative suggestions to improve concreteness, assessability, acceptability, and suitability:
[Open text field]

### Subcompetency : Dealing with resistance

Indicators per level
**Foundation:** I recognise resistance to change in myself and in people around me.
**Intermediate:** I understand the causes and underlying reasons for resistance and see it as an opportunity for growth.
**Advanced:** I apply strategies to manage resistance during change processes.
**Expert:** I proactively address resistance.

##### **Evaluation Questions**

To what extent do you find the wording of this competency and its indicators suitable for measuring innovative behaviour and entrepreneurship within a healthcare organisation?

| 1 | 2 | 3 | 4 | 5 | 6 |
| --- | --- | --- | --- | --- | --- |

To what extent do you find the wording sufficiently concrete and assessable?

| 1 | 2 | 3 | 4 | 5 | 6 |
| --- | --- | --- | --- | --- | --- |

To what extent do you find the wording acceptable?

| 1 | 2 | 3 | 4 | 5 | 6 |
| --- | --- | --- | --- | --- | --- |

Alternative suggestions to improve concreteness, assessability, acceptability, and suitability:
[Open text field]

### Subcompetency : Implementing value-creating activities

Indicators per level
**Foundation:** I understand the different steps needed to initiate change within my work environment.
**Intermediate:** I analyse the impact of the implementation within my work environment.
**Advanced:** I define the key hindering and facilitating factors necessary to shape the implementation process.
**Expert:** I adjust the implementation strategies based on the measured indicators to successfully implement the value-creating activity.

##### **Evaluation Questions**

To what extent do you find the wording of this competency and its indicators suitable for measuring innovative behaviour and entrepreneurship within a healthcare organisation?

| 1 | 2 | 3 | 4 | 5 | 6 |
| --- | --- | --- | --- | --- | --- |

To what extent do you find the wording sufficiently concrete and assessable?

| 1 | 2 | 3 | 4 | 5 | 6 |
| --- | --- | --- | --- | --- | --- |

To what extent do you find the wording acceptable?

| 1 | 2 | 3 | 4 | 5 | 6 |
| --- | --- | --- | --- | --- | --- |

Alternative suggestions to improve concreteness, assessability, acceptability, and suitability:
[Open text field]

## Competency: Coping with ambiguity, uncertainty and risks

This competency involves managing and applying strategies when facing uncertainty, ambiguity, and risks.

### Subcompetency : Dealing with uncertainty and ambiguity

Indicators per level
**Foundation:** I explore my own ways of achieving things and I am not afraid to make mistakes when trying new things.
**Intermediate:** I search for and compare different sources of information to help me reduce ambiguity, uncertainty, and risks when making decisions.
**Advanced:** I bring together different viewpoints to make well-considered decisions when the level of uncertainty is high.
**Expert:** I develop appropriate strategies for gathering and verifying data, which help me make decisions in uncertain and ambiguous situations.

##### **Evaluation Questions**

To what extent do you find the wording of this competency and its indicators suitable for measuring innovative behaviour and entrepreneurship within a healthcare organisation?

| 1 | 2 | 3 | 4 | 5 | 6 |
| --- | --- | --- | --- | --- | --- |

To what extent do you find the wording sufficiently concrete and assessable?

| 1 | 2 | 3 | 4 | 5 | 6 |
| --- | --- | --- | --- | --- | --- |

To what extent do you find the wording acceptable?

| 1 | 2 | 3 | 4 | 5 | 6 |
| --- | --- | --- | --- | --- | --- |

Alternative suggestions to improve concreteness, assessability, acceptability, and suitability:
[Open text field]

### Subcompetency : Risk management

Indicators per level
**Foundation:** I describe the risks associated with the simple value-creating activity I am involved in.
**Intermediate:** I critically evaluate the acceptable and unacceptable risks of a value-creating idea, taking various factors into account.
**Advanced:** I conduct a risk assessment and develop a risk management plan to guide my own or my team’s choices in developing my value-creating activity.
**Expert:** I apply strategies to mitigate the risks that may arise during the value creation process.

##### **Evaluation Questions**

To what extent do you find the wording of this competency and its indicators suitable for measuring innovative behaviour and entrepreneurship within a healthcare organisation?

| 1 | 2 | 3 | 4 | 5 | 6 |
| --- | --- | --- | --- | --- | --- |

To what extent do you find the wording sufficiently concrete and assessable?

| 1 | 2 | 3 | 4 | 5 | 6 |
| --- | --- | --- | --- | --- | --- |

To what extent do you find the wording acceptable?

| 1 | 2 | 3 | 4 | 5 | 6 |
| --- | --- | --- | --- | --- | --- |

Alternative suggestions to improve concreteness, assessability, acceptability, and suitability:
[Open text field]

## Competency: Working with athors

This competency involves developing a value-creating activity together with a team, with a focus on accepting diversity, actively listening, giving and receiving feedback, and expanding the network.

### Subcompetency : Accepting diversity

Indicators per level
**Foundation:** I am aware of diversity and show respect for others’ values and norms, backgrounds, situations, and ways of thinking.
**Intermediate:** I value diversity as a potential source of ideas and opportunities.
**Advanced:** I actively use diversity in my search for ideas that create added value for my activity.
**Expert:** --> (not specified)

##### **Evaluation Questions**

To what extent do you find the wording of this competency and its indicators suitable for measuring innovative behaviour and entrepreneurship within a healthcare organisation?

| 1 | 2 | 3 | 4 | 5 | 6 |
| --- | --- | --- | --- | --- | --- |

To what extent do you find the wording sufficiently concrete and assessable?

| 1 | 2 | 3 | 4 | 5 | 6 |
| --- | --- | --- | --- | --- | --- |

To what extent do you find the wording acceptable?

| 1 | 2 | 3 | 4 | 5 | 6 |
| --- | --- | --- | --- | --- | --- |

Alternative suggestions to improve concreteness, assessability, acceptability, and suitability:
[Open text field]

### Subcompetency: Actively listening and developing emotional intelligence

Indicators per level
**Foundation:** I am open to involving others and I discuss the benefits of listening to others' ideas to achieve my goals (or those of my team).
**Intermediate:** I listen to stakeholders’ ideas to create value without showing prejudice.
**Advanced:** I implement strategies to actively listen to my end users and act on their needs.
**Expert:** I gather information from various sources to understand the needs of my end users.

##### **Evaluation Questions**

To what extent do you find the wording of this competency and its indicators suitable for measuring innovative behaviour and entrepreneurship within a healthcare organisation?

| 1 | 2 | 3 | 4 | 5 | 6 |
| --- | --- | --- | --- | --- | --- |

To what extent do you find the wording sufficiently concrete and assessable?

| 1 | 2 | 3 | 4 | 5 | 6 |
| --- | --- | --- | --- | --- | --- |

To what extent do you find the wording acceptable?

| 1 | 2 | 3 | 4 | 5 | 6 |
| --- | --- | --- | --- | --- | --- |

Alternative suggestions to improve concreteness, assessability, acceptability, and suitability:
[Open text field]

### Subcompetency : Collaborating

Indicators per level
**Foundation:** I am open to working both independently and with others, taking on different roles and accepting responsibility.
**Intermediate:** I share ownership of value-creating activities with my team members and contribute constructively to group decision-making.
**Advanced:** I assemble a team based on each member’s individual knowledge, skills, and attitudes, and I use techniques and tools that help people collaborate effectively.
**Expert:** I build the organisation’s capacity to create value by encouraging people to collaborate on value-creating activities.

##### **Evaluation Questions**

To what extent do you find the wording of this competency and its indicators suitable for measuring innovative behaviour and entrepreneurship within a healthcare organisation?

| 1 | 2 | 3 | 4 | 5 | 6 |
| --- | --- | --- | --- | --- | --- |

To what extent do you find the wording sufficiently concrete and assessable?

| 1 | 2 | 3 | 4 | 5 | 6 |
| --- | --- | --- | --- | --- | --- |

To what extent do you find the wording acceptable?

| 1 | 2 | 3 | 4 | 5 | 6 |
| --- | --- | --- | --- | --- | --- |

Alternative suggestions to improve concreteness, assessability, acceptability, and suitability:
[Open text field]

### Subcompetency : Giving and receiving feedback

Indicators per level
**Foundation:** I recognise the importance of feedback in a professional context and I am aware of the purpose and benefits of giving and receiving feedback.
**Intermediate:** I have basic feedback skills and I provide constructive feedback in a respectful and empathetic manner.
**Advanced:** I have coaching skills and I use feedback to guide and support others in their professional growth and development.
**Expert:** I promote a feedback culture within my work environment, encourage open communication, and create a safe environment for giving and receiving feedback.

##### **Evaluation Questions**

To what extent do you find the wording of this competency and its indicators suitable for measuring innovative behaviour and entrepreneurship within a healthcare organisation?

| 1 | 2 | 3 | 4 | 5 | 6 |
| --- | --- | --- | --- | --- | --- |

To what extent do you find the wording sufficiently concrete and assessable?

| 1 | 2 | 3 | 4 | 5 | 6 |
| --- | --- | --- | --- | --- | --- |

To what extent do you find the wording acceptable?

| 1 | 2 | 3 | 4 | 5 | 6 |
| --- | --- | --- | --- | --- | --- |

Alternative suggestions to improve concreteness, assessability, acceptability, and suitability:
[Open text field]

### Subcompetency : Expanding networks

Indicators per level
**Foundation:** I make new contacts and collaborate with others (both individuals and groups).
**Intermediate:** I build new relationships to gain the support I need to turn ideas into action.
**Advanced:** I proactively connect with the right people within and outside my organisation to support my value-creating activity (or that of my team).
**Expert:** I design effective processes to build networks of different or new stakeholders and keep them engaged.

##### **Evaluation Questions**

To what extent do you find the wording of this competency and its indicators suitable for measuring innovative behaviour and entrepreneurship within a healthcare organisation?

| 1 | 2 | 3 | 4 | 5 | 6 |
| --- | --- | --- | --- | --- | --- |

To what extent do you find the wording sufficiently concrete and assessable?

| 1 | 2 | 3 | 4 | 5 | 6 |
| --- | --- | --- | --- | --- | --- |

To what extent do you find the wording acceptable?

| 1 | 2 | 3 | 4 | 5 | 6 |
| --- | --- | --- | --- | --- | --- |

Alternative suggestions to improve concreteness, assessability, acceptability, and suitability:
[Open text field]

## Competency: Learning through experience

This competency involves reflecting and learning from experiences, both failures and successes, as well as learning through others.

### Subcompetency : Reflecting

Indicators per level
**Foundation:** I provide examples of temporary failures and successes that have led to valuable achievements.
**Intermediate:** I assess whether and how I have achieved my goals, so I can evaluate my performance and learn from it.
**Advanced:** I help others reflect on their performance, temporary failures, and successes by providing honest and constructive feedback.
**Expert:** I elevate my team or organisation to a higher level of performance, based on collected feedback and by drawing lessons from successes and failures.

##### **Evaluation Questions**

To what extent do you find the wording of this competency and its indicators suitable for measuring innovative behaviour and entrepreneurship within a healthcare organisation?

| 1 | 2 | 3 | 4 | 5 | 6 |
| --- | --- | --- | --- | --- | --- |

To what extent do you find the wording sufficiently concrete and assessable?

| 1 | 2 | 3 | 4 | 5 | 6 |
| --- | --- | --- | --- | --- | --- |

To what extent do you find the wording acceptable?

| 1 | 2 | 3 | 4 | 5 | 6 |
| --- | --- | --- | --- | --- | --- |

Alternative suggestions to improve concreteness, assessability, acceptability, and suitability:
[Open text field]

### Subcompetency : Learning from experience and through others

Indicators per level
**Foundation:** I recognise what I have learned by participating in the activity and provide examples showing that my skills and competence have increased through experience.
**Intermediate:** I constantly look for opportunities to improve my strengths and reduce or compensate for my weaknesses, while filtering feedback from others and retaining what is useful.
**Advanced:** I help others reflect on their interactions with others and support them in developing their strengths and reducing or compensating for their weaknesses.
**Expert:** I draw lessons from monitoring and evaluation processes and design a strategy for my organisation to continue generating value.

##### **Evaluation Questions**

To what extent do you find the wording of this competency and its indicators suitable for measuring innovative behaviour and entrepreneurship within a healthcare organisation?

| 1 | 2 | 3 | 4 | 5 | 6 |
| --- | --- | --- | --- | --- | --- |

To what extent do you find the wording sufficiently concrete and assessable?

| 1 | 2 | 3 | 4 | 5 | 6 |
| --- | --- | --- | --- | --- | --- |

To what extent do you find the wording acceptable?

| 1 | 2 | 3 | 4 | 5 | 6 |
| --- | --- | --- | --- | --- | --- |

Alternative suggestions to improve concreteness, assessability, acceptability, and suitability:
[Open text field]
