# Supplementary material for: The Cii-care Framework: A Contextual Adaptation and Validation of Entrecomp for Intrapreneurial and Innovative Competencies in Healthcare- a Mixed-methods Study in Flanders
Source: Research Square preprint supplement (doi:10.21203/rs.3.rs-6047635/v1), 2025-11-10
Supplement: Supplementary file 2 [file e7db815a07a7802d4c18ea93.docx]

# BMC Medical Education

**THE CII-CARE FRAMEWORK: A CONTEXTUAL ADAPTATION AND VALIDATION OF ENTRECOMP FOR INTRAPRENEURIAL AND INNOVATIVE COMPETENCIES IN HEALTHCARE- A MIXED-METHODS STUDY IN FLANDERS**

Sabrina Nachtergaele¹, Nele De Roo¹, Tom Stevens2, Mieke Embo 1,3

1 Research and Innovation Centre Health and Care, Artevelde University of Applied Sciences, Voetweg 66, 9000 Ghent, Belgium

2 Reset.Vlaanderen vzw, Tweekerkenstraat 47, 1000 Brussel

3 Department of Educational Studies, Faculty of Psychology and Educational Sciences, Ghent University, H. Dunantlaan 2, Ghent, 9000, Belgium

**Corresponding author:**
Sabrina Nachtergaele, Artevelde University of Applied Sciences, Voetweg 66, 9000 Gent, Belgium
Email: sabrina.nachtergaele@arteveldehs.be

# Abstract

**Background:** The rapid evolution of healthcare demands professionals with intrapreneurial and innovative competencies to improve patient care and organizational efficiency. Although the EntreComp framework provides a well-established model for entrepreneurial competence development, a validated, contextualized adaptation for the healthcare sector is lacking. This study aimed to develop and validate the CII-CARE framework, an adaptation of EntreComp tailored to support healthcare professionals in Flanders, Belgium.

**Methods:**  A mixed-methods approach was applied, combining the Nominal Group Technique (NGT) and Delphi method. Twelve experts from academia, policy, education, and healthcare sectors participated in one focus group and three iterative Delphi rounds. Qualitative thematic analysis refined the framework iteratively, while quantitative analysis included Content Validity Index (CVI) calculations, medians, and score distributions.

**Results:** The validated CII-CARE Framework consists of three competency clusters: *Ideas and Opportunities*, *Resources*, and *Into Action*, encompassing 15 competencies, 38 sub-competencies, and 150 behavioral indicators. Consensus was reached on most sub-competencies, with CVI scores exceeding 0.78 for most items, reflecting substantial agreement. Expert feedback led to refinements such as merging overlapping content and improving the clarity of behavioral indicators.

**Conclusions:** The CII-CARE Framework provides a validated tool for healthcare organizations to foster and evaluate intrapreneurial and innovative competencies. Integrating this framework into professional development programs may enhance healthcare professionals’ skills, improve job satisfaction, and support innovation, ultimately contributing to better patient care and organizational efficiency.

**Keywords:** Intrapreneurship, Innovation, Competency framework, Healthcare professionals, Delphi method, Nominal Group Technique.

# Main document

## Background

The rising demand for healthcare, coupled with ongoing transformations in the field, highlights the need for all healthcare professionals within healthcare organizations to demonstrate **intrapreneurial and** **innovative behavior** (1–3)**.** Thisbehavior plays a crucial role in influencing positive outcomes for patients, professionals and organizations. First, for patients to support the development and implementation of new treatment strategies and procedures improving the quality of patient care. Second, for the professionals to improve job satisfaction, reduce their intention to leave the profession, and stimulate continuous professional development (4–6). Finally, for organizations to solve organizational problems such as workforce shortages by enhancing efficiency and performance of healthcare professionals (4–6).

Efforts to promote intrapreneurial and innovative behavior in healthcare encounter two significant problems: (1) the lack of clear and widely accepted definitions, and consequently (2) the absence of a comprehensive competency framework to guide development.

First, concepts of **entrepreneurship**, **intrapreneurship**, and **innovation** are often defined and interpreted in various ways in the literature. **Entrepreneurship**, as defined by the European Commission (7), embodies the ability of individuals to turn ideas into tangible results, including creativity, innovation, risk-taking, and project management. Entrepreneurs tend to be more risk-tolerant and innovative in their thinking, with a strong action- and goal-oriented mindset and a higher drive for achievement compared to the general population (8). The concept of entrepreneurship differs from intrapreneurship. Boore and Porter (9) conceptualize **intrapreneurship** at the individual level as the application of entrepreneurial thinking within one's work and emphasize its role in driving organizational change and progress. As an example, an intrapreneurial healthcare professional can be defined as “one who creates innovation within the healthcare organization through the introduction of a new product, a different service or simply a new way of doing something” (10). In the realm of intrapreneurship, characteristic dimensions encompass new business venturing, product/service innovation, process innovation, self-renewal, risk-taking, proactiveness, and competitive aggressiveness (10). **Innovation**, defined as **innovative behavior** by Asurakkody et al. (6), involves individual actions to generate and implement new ideas in an organization, highlighting the importance of initiative and culture in fostering creativity. These authors identified in their concept analysis eight key dimensions of innovative behavior: opportunity exploration, idea generation, idea search, communication, promotion of ideas, championing, developing and testing new prototypes, and overcoming obstacles (6). In the context of the healthcare sector, fostering intrapreneurial and innovative behavior is essential to address its challenges. Promoting these behaviors by defining their underlying competencies better equip healthcare professionals and organizations to identify opportunities for improvement, develop creative solutions, and implement changes that directly benefit patient outcomes. A validated concept and competency framework will not only provide a standardized method for developing, monitoring and evaluating individual professionals’ competencies but also promote alignment between individual development and organizational objectives, contributing to the overarching goal of delivering high-quality healthcare. Based on a synthesis of definitions and concept analyses from the literature on entrepreneurship, intrapreneurship, and innovative behaviour, a working definition of innovative and intrepreneurial behaviour tailored to the healthcare context was developed. *Innovative and intrapreneurial behaviour refers to the actions of healthcare professionals who generate, promote, and implement new ideas, while proactively identifying opportunities and taking initiative to improve care processes, services, or practices within their organization.* This definition, newly introduced in the healthcare context and derived from prior conceptual work (6,9), has not yet been empirically validated as a standalone model, but provided a theoretically grounded and practice-relevant foundation for framework development.

The second problem is the absence of a context-specific competency framework tailored to the development of innovative and intrapreneurial competencies in the healthcare sector. While several competency frameworks exist, they are either too generic or insufficiently attuned to the specific demands of healthcare environments. For example, the European Commission’s EntreComp Framework offers a validated and comprehensive model of entrepreneurial competencies across domains such as creativity, ethical thinking, and taking initiative (7). However, EntreComp is primarily designed for educational and business contexts, and does not consider sector-specific requirements such as patient safety, ethical complexity, interprofessional collaboration, and regulatory accountability.

Within healthcare itself, a widely used model such as CanMEDS (Canadian Medical Education Directives for Specialists) for physicians focus predominantly on clinical practice, communication, and professional behaviour (11). Although this framework addresses important aspects of competence, it pays limited attention to innovation-oriented behaviors such as opportunity exploration, risk-taking, and the implementation of new ideas that are essential to meet the rapidly evolving challenges in healthcare (6,10).

Given these limitations, there is a clear need for a healthcare-specific framework that translates innovation and intrapreneurship into concrete, observable competencies. The CII-CARE Framework responds to this gap by integrating relevant insights from entrepreneurship literature and healthcare innovation studies, and by operationalizing these into structured clusters, sub-competencies, and behavioral indicators tailored to the realities of healthcare professionals.

The challenge of developing competency frameworks in healthcare lies in the absence of a clear gold standard or standardized approach, resulting in significant variation and inconsistency in the methodological strategies used across professions (12). **Competency frameworks**, as outlined by Batt et al. (12), serve as structured models that guide professional development and performance by outlining different layers: the essential competencies, sub-competencies, and behavioral indicators needed for effective practice. In general, **competencies** are defined as the proven ability to use knowledge, skills and personal, social and/or methodological abilities, in work or study situations and in professional and personal development (13). **Sub-competencies** further break down these competencies into specific, actionable elements. **Behavioral indicators** provide concrete, observable examples of how competencies are demonstrated in practice, ensuring that they are measurable and relevant in real-world settings (11).

Although the importance of intrapreneurial and innovative behavior in healthcare is widely recognized, further research is needed to identify the **specific competencies** that underpin these behaviors within the healthcare sector (14). This study aimed at developing and validating a new competency framework, the CII-CARE Framework (**C**ompetencies for **I**nnovation and **I**ntrapreneurship in Health**care**), with specific competencies to support intrapreneurial and innovative behavior among healthcare professionals.

## Method

### Design

A mixed methods design combining two consensus methods, - a modified nominal group technique and a Delphi study, was used to address the need to ensure comprehensive input and consensus from a diverse group of stakeholders (17). The development and validation phases (Figure 1) were conducted between February and October 2023 in Flanders (Belgium). The ACCORD guideline was used to report the research process (15).

Formal **consensus methods** share core principles that distinguish them from informal approaches. These principles include anonymity, iterative feedback, statistical group response, and structured interactions (16,17). Two widely recognized consensus methods are the nominal group technique (NGT) and the Delphi method. The **nominal group technique (NGT)** is characterized by a structured face-to-face interaction with smaller groups of experts, usually ranging from 5 to 12 individuals. The NGT process consists of several steps, such as formulating and presenting the nominal question, generating ideas privately, providing round-robin feedback to record each idea, conducting structured group discussions with a skilled moderator, ranking ideas privately, and providing anonymous feedback to the entire group. Additional group discussions and private voting may be conducted as needed to ensure consensus is reached (18). The **Delphi method** entails iterative rounds of anonymous questionnaires until consensus or a predetermined endpoint is achieved. This method typically involves six stages, including problem identification, literature review, questionnaire development, iterative questionnaire rounds, feedback provision, and summarization of findings (16,17). In this study, we integrated the strengths of the NGT and the Delphi method to enhance the robustness of the consensus-building process. By combining the structured, face-to-face discussions of the NGT with the anonymous feedback provided during Delphi rounds, we adopted a comprehensive method to gather expert opinions and reach consensus.

Figure 1: Development and validation process

### Development phase

#### Defining the research problem

As outlined in the introduction, this study addresses two central challenges: (1) the lack of clear and consistent definitions for key concepts such as intrapreneurship and innovation in healthcare, and (2) the absence of a validated, context-specific competency framework to guide the development of these competencies in healthcare professionals. These interrelated issues formed the basis for the development process of the CII-CARE Framework.

#### Exploring literature review

An exploratory literature review was conducted by the main researchers (S.N. and N.D.R.) to identify relevant definitions, frameworks, and competencies related to intrapreneurship and innovative behaviour in healthcare. The goal of this review was to gain conceptual insight and practical grounding to inform the development of a new competency framework. The review focused on literature that (1) offered conceptual clarity, (2) addressed competency-based approaches, and (3) had potential for contextual adaptation.

The search strategy was carried out using Google Scholar, EBSCOhost, Elsevier Science Direct, and PubMed. Search terms such as “intrapreneurship”, “entrepreneurship”, “innovation”, “intrapreneurial behavior”, “innovative behavior”, “entrepreneurial behaviour”, “intrapreneurial competenc*”, “innovative competenc*”, “entrepreneurial competenc*” were used. . Inclusion criteria focused on peer-reviewed articles published within the last 10 years in English. Exclusion criteria were studies outside healthcare settings to ensure relevance to the healthcare context.

In total, 47 sources were analyzed (38 academic articles and 9 grey literature sources such as including policy reports and strategic documents). These were reviewed by the two researchers to identify recurring themes, conceptual overlaps, and relevance to the Flemish healthcare context. The exploratory review highlighted the absence of a validated, sector-specific competency framework explicitly targeting intrapreneurial and innovative behaviour in healthcare. While existing models such as CanMEDS are tailored to the healthcare context, they do not provide a concrete operationalisation of innovative and intrapreneurial competencies. In contrast, the EntreComp framework—developed by the European Commission—offers a comprehensive and validated structure comprising 15 competencies and 60 sub-competencies. However, it was originally designed for entrepreneurship and not specifically adapted to the healthcare sector. Six academic references did describe relevant individual competencies, which served as a foundation for further contextualization (2,3,5,6,19,20). Building on insights from both scientific and grey literature, Table 1 provides an overview of key competencies related to innovative and intrapreneurial behaviour in healthcare.

EntreComp was selected as the foundational framework due to its structured nature, transferability, and adaptability for developing the CII-CARE Framework.

Table 1 Innovative and intrapreneurial competencies for healthcare professionals and supporting references

| ****Competencies**** | ****Description**** | ****References**** |
| --- | --- | --- |
| **Opportunity exploration** | Identifying or discovering new possibilities for improvement in healthcare practice. | Asurakkody & Shin, 2018; Eines & Vatne, 2018; Snow, 2019; Zuber & Moody, 2018; Zuber & Weberg, 2020 |
| **Idea generation** | Creatively generating original ideas in response to problems or challenges. | Asurakkody & Shin, 2018; Snow, 2019; Zuber & Weberg, 2020 |
| **Idea search / Knowledge acquisition** | Actively seeking new insights or retrieving knowledge from external/internal sources. | Asurakkody & Shin, 2018; Eines & Vatne, 2018 |
| **Idea communication** | Effectively presenting and justifying new ideas to peers or managers to gain support. | Asurakkody & Shin (2018) |
| **Idea championing** | Taking ownership of ideas and leading their realization within unstructured environments. | Asurakkody & Shin, 2018; Zuber & Weberg, 2020 |
| **Application and implementation** | Turning ideas into actions by piloting, testing, and integrating them into standard procedures. | Asurakkody & Shin, 2018 |
| **Overcoming obstacles** | Addressing resistance or barriers to innovation by adapting strategies or ideas. | Asurakkody & Shin, 2018; Green & Plsek, 2002 |
| **Initiative and self-confidence** | Proactively taking the lead and trusting one’s own judgment in initiating change. | Asurakkody & Shin, 2018; Zuber & Weberg, 2020 |
| **Collaboration and stakeholder involvement** | Engaging with others across professional boundaries to support innovation. | Eines & Vatne, 2018; Snow, 2019 |
| **Strategic vision and future orientation** | Formulating long-term ideas and directions aligned with system-level healthcare improvement. | Green & Plsek, 2002; Snow, 2019 |
| **Resilience and adaptability** | Persisting through challenges and adjusting behavior to maintain innovative momentum. | Asurakkody & Shin, 2018; Zuber & Weberg, 2020 |
| **Communication and persuasion skills** | Convincing others of the value of innovations and gaining buy-in. | Asurakkody & Shin, 2018 |
| **Innovative work behavior in healthcare** | Intentionally developing and implementing new solutions to improve health outcomes. | Asurakkody & Shin, 2018; Green & Plsek, 2002 |
| **Individual innovativeness** | A dispositional tendency to perceive and embrace innovation, linked to personality traits. | Asurakkody & Shin, 2018; Green & Plsek, 2002 |
| **Organizational awareness** | Understanding the context, systems, and culture in which innovation takes place. | Zuber & Weberg, 2020 |
| **Motivating others and team leadership** | Encouraging others to join the innovation process and aligning team efforts. | Snow, 2019; Zuber & Weberg, 2020 |

#### Development of the first draft

The exploratory literature review showed strong conceptual overlap between EntreComp and the key competencies identified in both scientific and grey literature. Its structured nature, clarity, and broad recognition made it a suitable foundation for adaptation to the healthcare context. Therefore, EntreComp —consisting of competence clusters, competencies, and sub-competencies—was selected as the starting point for the development of the CII-CARE Framework, with contextual refinement to ensure relevance to healthcare practice.

However, we observed that the original behavioural indicators of the EntreComp were not adapted to the healthcare context and primarily focused on entrepreneurship outside of organisational settings. Therefore, the exploratory literature review was instrumental in redefining these indicators. Drawing on evidence from sector-specific studies, we reformulated the behavioural indicators to reflect innovative and intrapreneurial behaviour of healthcare professionals.

As a result of this process, the CII-CARE framework is a contextual adaptation of the EntreComp framework developed by the European Commission. Building upon the EntreComp structure—which comprises three competency clusters, each encompassing associated competencies and sub-competencies—we adapted the behavioral indicators to align with the unique demands and context of the healthcare context. This adaptation process was guided by literature insights and expert validation to ensure relevance for healthcare professionals.

Three competency **clusters** of EntreComp remained in CII-CARE: *'Ideas and opportunities (1)'*, *'Resources (2)'* and ‘*Into action (3)'* (Fig. 1). Also the competencies, and sub-competencies were directly adopted from EntreComp (Fig.1). The main difference was made at the level of the behavioral indicators. These indicators were originally structured by EntreComp across different levels of proficiency (foundation, intermediate, advanced, and expert). Different researchers (S.N.; N.D.; T.S.) individually evaluated each behavioral indicator and then collaboratively adapted them to align with the context-specific aim of the CII-CARE framework. The revised behavioral indicators were subsequently discussed with the entire research team, leading to a consensus that defined the first draft of the CII-CARE Framework.

| 1. Ideas and opportunities | | 1. Recources | | 1. Into action | |
| --- | --- | --- | --- | --- | --- |
| **(1.1)**  (1.1.1)  (1.1.2)  (1.1.3)  **(1.2)**  (1.2.1)  (1.2.2)  (1.2.3)  (1.2.4)  **(1.3)**  (1.3.1)  (1.3.2)  **(1.4)**  (1.4.1)  **(1.5)**  (1.5.1)  (1.5.2)  (1.5.3) | **Spotting opportunities**  Identifying, creating and spotting opportunities  Problem Definition  Analyzing the context  **Creativity**  Being curious and open-minded  Generating ideas  Understanding the value of prototypes  Being innovative  **Vision**  Using imagination  Strategic thinking  **Valuing ideas**  Valuing ideas  **Ethical and sustainable thinking**  Ethical behaviour  Thinking sustainably  Evaluating the impact | **(2.1)**  (2.1.1)  (2.1.2)  (2.1.3)  **(2.2)**  (2.2.1)  (2.2.2)  **(2.3)**  (2.3.1)  (2.3.2)  (2.3.3)  **(2.4)**  (2.4.1)  (2.4.2) | **Self-awareness and self-efficacy**  Identifying strengths and growth areas  Belief in oneself  Shaping your future and following your expectations  **Motivation and perseverance**  Staying motivated and focusing on what drives you  Being resilient and persevering  **Financial and economic literacy**  Managing budgets  Fundraising  ~~Acquiring legal knowledge~~  **Mobilising others**  Inspiring and persuading  Effectively communicating and using relevant media | **(3.1)**  (3.1.1)  (3.1.2)  **(3.2)**  (3.2.1)  (3.2.2)  (3.2.3)  (3.2.4)  (3.2.5)  **(3.3)**  (3.3.1)  (3.3.2)  **(3.4)**  (3.4.1)  (3.4.2)  (3.4.3)  (3.4.4)  (3.4.5)  **(3.5)**  (3.5.1)  (3.5.2) | **Taking the initiative**  Taking responsibility  Acting proactively  **Planning and management**  Setting goals  Working systematically  Setting priorities  Dealing with resistance  Implementing value-creating activities  **Coping with ambiguity, uncertainty and risk**  Dealing with uncertainty and ambiguity  Risk management  **Working with others**  Accepting diversity  Active listening and developing emotional intelligence  Collaboration  Giving and receiving feedback  Expanding networks  **Learning through experience**  Reflecting  Learning from experience and from others |

Figure 2 The CII-CARE Framework with Clusters (X), Competencies (X.X) and Sub-competencies (X.X.X) (full list in annex).

### Validation phase

#### Experts for NGT and Delphi

A purposive sampling approach was used to recruit experts from diverse professional settings—including academia, policy organizations, educational institutions, and various domains of healthcare practice such as residential elderly care, hospital settings, and primary care in Flanders. This diversity was intended to ensure a broad representation of perspectives and to support the framework’s applicability across the wider healthcare sector. Given the limited number of professionals in Flanders with formal expertise in intrapreneurial and innovative behavior in healthcare, clear inclusion and exclusion criteria were applied. Experts were included if they demonstrated either substantive knowledge of intrapreneurship, entrepreneurship, or innovation, or had a thorough understanding of the tasks, challenges, and responsibilities of healthcare professionals in practice. Individuals lacking experience or expertise in these areas were excluded.

The diversity of the participants was further ensured by including variations in gender, age, healthcare backgrounds, and academic fields. The lead researcher (S.N.) sent an email to the experts on March 31, 2023 with information of the study and a link to a Microsoft Forms survey where experts could indicate their interest in joining the validation process. Of the 36 experts invited, 12 agreed to participate in the study.

#### Nominal group technique

Prior to the online meeting on May 9, participants received the initial draft of the competency framework and were asked to reflect individually on the competency clusters, competencies, sub-competencies, and behavioral indicators. The NGT was initiated by presenting the nominal question: *“What are the key competencies that healthcare professionals need to possess to enact innovative behavior and intrapreneurship in healthcare?”* Participants were instructed to privately record their ideas, considerations, and comments in advance, to ensure unbiased and structured input during the group discussion.

Five experts were unable to attend the meeting but expressed a desire to continue participating in the validation process.

The meeting began with a **round-robin feedback session**, allowing each expert to share their insights on the CII-CARE framework, and ensuring that all voices were heard. The facilitator (S.N.) guided the discussion by systematically prompting the panel to share any observations or feedback. When experts presented their ideas and made suggestions, the researchers (S.N.; N.D.; T.S.) created opportunities for discussion to delve deeper into the feedback and build consensus. This meeting provided a structured platform for thorough debate and collaborative refinement of the CII-CARE framework. To safeguard participant anonymity and mitigate the influence of dominant voices during the meeting, the evaluation and prioritization phase was deliberately postponed and conducted through an **anonymous online questionnaire** that was sent immediately after the online meeting. This follow-up step enabled participants to provide structured, critical feedback without peer pressure, thereby enhancing the validity and balance of the results (2,3,5,6,19,20). Following the meeting and the insights gathered from the online questionnaire, the research team thoroughly reviewed and analyzed all contributions, resulting in the development of a refined second draft of the CII-CARE framework.

#### Delphi-Method

##### Participants and datacollection:

On June 8, 2023, the lead researcher (S.N.) sent an email to the same 12 experts with the second draft, a detailed description of the Delphi procedure and a link to a Microsoft Forms survey initiating the Delphi method. The competency clusters, competencies, sub-competencies, and behavioral indicators from the second draft were incorporated into the survey. **Surveys were distributed via email** across three consecutive Delphi rounds, and participants' responses were pseudonymized to ensure confidentiality.. In each round, experts were asked to evaluate the behavioral indicators within the context of healthcare organizations based on three criteria: 1) relevance (suitable for measuring innovative behavior and intrapreneurship within a healthcare organization), 2) comprehensibility (adequately concrete and assessable), and 3) acceptability (formulated in a manner acceptable for healthcare professionals) (Table 1). Experts were asked to rate each item on a 6-point Likert scale (1 = strongly disagree; 6 = strongly agree). The scale was intentionally designed without a midpoint to encourage clear preferences and rejections, thereby supporting stronger consensus formation (21). Additionally, an open section was included for experts to provide feedback on the competency clusters, competencies, sub-competencies and behavioral indicators.

##### Quantitative and qualitative analysis:

A **quantitative analysis** was conducted on the scores of the three criteria (relevance, comprehensibility, and acceptability). Descriptive statistics, including medians and levels of consensus, were calculated after each Delphi round and processed using Excel. To evaluate the degree of agreement among experts, the Content Validity Index (CVI) was calculated for each item and for the overall scale. The CVI measures the proportion of experts who rate an item as relevant or appropriate and is commonly used to assess the content validity of newly developed tools. In line with established benchmarks for panels of seven experts, a CVI higher than 0.83 is considered good, while values above 0.78 are deemed acceptable (22). A behavioral indicator was considered accepted if the median score reached 4 or higher. The distribution of responses across tertiles was examined, with particular attention to situations in which over 30% of scores were concentrated in the first or third tertile without overlap, as this was used to assess consensus or polarization.

The Delphi process involved three iterative rounds to validate the competency framework. In each round, experts evaluated the competencies, sub-competencies, and behavioral indicators based on the specified criteria. They had the opportunity to provide qualitative feedback. Items that did not meet the thresholds were excluded or revised based on expert input and subsequently presented for reevaluation in the next round. Experts received anonymized feedback on the outcomes of each preceding round, including justifications for any changes or deletions, and were encouraged to offer further suggestions.

Experts' suggestions and comments were collected through open text fields in the survey, anonymized, and compiled into an Excel file. The feedback was then reviewed per item, and recurring suggestions regarding clarity, relevance, or formulation were identified and used to refine the behavioral indicators (23).

Table 1 Overview of the research criteria within the Delphi-Method

| Research criteria | Question |
| --- | --- |
| Relevance | To what extent do you find the formulation of behavioral indicators appropriate to measure innovative behavior and entrepreneurship within a healthcare organization? |
| Comprehensibility | To what extent do you find the formulation of these behavioral indicators sufficiently concrete and assessable? |
| Acceptability | To what extent do you find the formulation of these behavioral indicators acceptable? |

## Results

### Experts

During the initial focus group session, seven experts (58%) actively contributed to the NGT. Similarly, in the first Delphi round, seven experts (58%) participated. In the second and third round seven experts (58%) and 11 experts (92%) completed the survey, respectively. Notably, the composition of the expert panel varied across the different rounds, as detailed in Table 2.

|  | NGT (n=7) | Round 1 (n=7) | Round 2 (n=7) | Round 3 (n=11) |
| --- | --- | --- | --- | --- |
| Gender  Male  Female | 2  5 | 2  5 | 3  4 | 5  6 |
| Age  21-30 years  31-40 years  41-50 years  51-60 years  >60 years | 1  3  2  1  0 | 0  5  1  1  0 | 0  4  1  2  0 | 0  7  1  3  0 |
| Healthcare experience   - 1. years   2. years   11-15 years  16-20 years  21-25 years  >25 years | 1  0  3  3  0  0 | 2  0  1  3  1  0 | 5  0  0  0  1  1 | 6  3  0  1  0  1 |
| Scientific experience  0-5 years  6-10 years  11-15 years  16-20 years  21-25 years  >25 years | 3  1  2  1  0  0 | 5  1  0  1  0  0 | 2  0  0  4  1  0 | 1  2  1  5  0  2 |

Figure 2 Demographic variables of the expert panel

### Nominal group technique

During the meeting, participants highlighted the need to clearly differentiate between intrapreneurship and entrepreneurship to foster a shared understanding, noting that these terms are often conflated or used interchangeably, particularly in Dutch, languages that are spoken in Flanders and the Netherlands. While the experts found the competencies and sub-competencies well-defined, they expressed concerns about the overly complex phrasing of certain behavioral indicators. Building on these insights, the following adjustments were made during the discussion (see Figure 2).

**Competency cluster 1: IDEAS AND OPPORTUNITIES.**

Under the competency ‘*Spotting Opportunities’*(1.1), the behavioral indicators within the sub-competencies were reformulated to be more action-oriented. This change was implemented because the original indicators were sometimes too vague, reducing their practical usefulness. Within the competency ’*Creativity*’ (1.2), the sub-competency *‘Identify, create and seize opportunities’* was redefined as *‘Being curious and open-minded (1.2.2).’* Furthermore, the sub-competency *‘Prototype recognition’* was updated to *‘Understanding the value of prototypes (1.2.3),’*highlighting the importance of recognizing and leveraging prototypes as a tool for exploring and validating ideas effectively.

**Competency cluster 2: RESOURCES:**

Under the competency *‘Self-awareness and Self-efficacy* (2.1)’, the sub-competency ‘*Identify strengths and weaknesses’* was updated to ‘*Identifying strengths and growth areas* (2.1.1).’ This change adopts a more positive and developmental approach, focusing on opportunities for improvement and potential growth rather than solely highlighting deficits. Within the competency ‘*Financial and Economic Literacy* (2.3)’, Legal aspects were integrated into the sub-competency ‘*Managing budgets* (2.3.2).’ This enhancement ensures that professionals are aware of the legal considerations related to financial management and recognize the importance of consulting experts when needed, rather than attempting to address such matters independently.

**Competency cluster 3: INTO ACTION**:

Within the competency ‘*Planning and Management* (3.2)’, the sub-competency *‘Dealing with resistance (3.2.4)* was refined to emphasize constructive engagement, starting from the foundational level. This revision highlights the importance of fostering a supportive environment where learning from mistakes is encouraged and valued. Within the competency ‘*Working with Others* (3.4)’, the terminology in the sub-competency *‘Collaboration (3.4.3)’* was standardized to ensure consistency and alignment with the overall framework.

In the NGT, the three competency clusters, 15 competencies, and 39 sub-competencies were validated. The behavioral indicators were presented in the Delphi procedure for validation (Table 3, Annex). Table 3 provides a summary of the consensus ratings for each competency cluster. It highlights the competencies and sub-competencies where experts agreed on the relevance, clarity, and acceptability of the behavioral indicators. Additionally, it identifies the areas that need further refinement based on expert feedback.

### Delphi round 1

During the first round of the Delphi methodology, consensus was achieved on most behavioral indicators for the competency clusters Ideas and Opportunities, Resources, and Into Action. The expert feedback resulted in consensus on 25 statements and the removal of one sub-competency.

Within the first competency cluster ‘**ideas and opportunities’** (1), 13 sub-competencies and their corresponding behavioral indicators were presented Consensus was achieved regarding the relevance, comprehensibility, and/or acceptability of 8 sub-competencies and their corresponding behavioral indicators: *identifying, creating, and spotting opportunities (1.1.1); being curious and open-minded (1.2.1); generating ideas (1.2.2); understanding the value of prototypes (1.2.3); being innovative (1.2.4); valuing ideas (1.4.1); thinking sustainably (1.5.2) and evaluating the impact (1.5.3)*. However, consensus was not reached on the associated behavioral indicators for 5 sub-competencies: *problem definition (1.1.2); analyzing the context (1.1.3); using imagination (1.3.1); strategic thinking (1.32); and ethical behavior (1.5.1)*.

Within the second competency cluster ‘**resources’**, 10 sub-competencies and their corresponding behavioral indicators were evaluated. Consensus was achieved on 5 sub-competencies and their corresponding behavioral indicators: *identifying strengths and growth areas (2.1.1), shaping your future and following your expectations (2.1.3), staying motivated and focusing on what drives you (2.2.1), being resilient and persevering (2.2.2), and managing budgets (2.3.1)*. However, consensus was not reached regarding one of the three criteria the relevance, comprehensibility, and/or acceptability of the associated behavioral indicators for 5 sub-competencies: *belief in oneself (2.1.2), fundraising (2.3.2), acquiring legal knowledge (2.3.3), inspiring and persuading (2.4.1), and effectively communicating and using relevant media (2.4.2)*. Based on expert feedback, the content of the sub-competency ‘*legal knowledge’* overlapped with ‘*fundraising’*. Therefore, its behavioral indicators were integrated into the ‘*fundraising’* sub-competency.

Within the third competency cluster ‘**into action’**, the expert panel evaluated 16 sub-competencies. Consensus was achieved on 11 sub-competencies and their corresponding behavioral indicators: *taking responsibility (3.1.1), acting proactively (3.1.2), setting goals (3.2.1), working systematically (3.2.2), implementing value-creating activities (3.2.5), dealing with uncertainty and ambiguity (3.3.1), risk management (3.3.2), active listening and developing emotional intelligence (3.4.2), collaboration (3.4.3), giving and receiving feedback (3.4.4), expanding networks (3.4.5), and reflecting (3.5.1)*. However, consensus was not reached in the first round regarding the relevance, comprehensibility, and/or acceptability of the associated behavioral indicators for 4 sub-competencies: *setting priorities (3.2.3), dealing with resistance (3.2.4), accepting diversity (3.4.1), and learning from experience and others (3.2.5)*. Based on expert feedback, the sub-competency of developing legal knowledge was removed.

Taking into account the feedback received in this first round, the researchers opted to refine the formulation of behavioral indicators across 13 sub-competencies and eliminated one redundant sub-competency: developing legal knowledge.

### Delphi round 2

In the second Delphi round, the panel revisited all behavioral indicators from the initial round, assessing them against the same three quality questions. They were briefed on the adjustments made to the 14 behavioral indicators and the removal of one sub-competency and invited to provide feedback.

In first competency cluster of **ideas and opportunities (1),** consensus was reached on 3 sub-competencies and their corresponding behavioral indicators related *to using imagination (1.3.1), strategic thinking (1.3.2), and ethical behavior (1.5.1)*. However, consensus was not achieved for 2 sub-competencies*: problem definition (1.1.2) and analyzing the context (1.1.3)*.

Within the competency cluster of **resources** **(2),** consensus was reached on all 5 sub-competencies: *belief in oneself (2.1.2), fundraising (2.3.2), inspiring and persuading (2.4.1), and effectively communicating and using relevant media (2.4.2)*.

Consensus was reached within the competency cluster of translating ideas **into action (3)** on 2 sub-competencies and their corresponding behavioral indicators related to *dealing with resistance (3.2.4) and accepting diversity (3.4.1).* However, consensus was not achieved for 2 sub-competencies: *setting priorities (3.2.3) and learning from experience and others (3.5.2)*.

Analysis of the findings of this second round led to a minor revision of the competency framework, involving adjustments to 4 behavioral indicators within sub-competencies. These updated behavioral indicators were presented to the expert panel during the third round.

### Delphi round 3

In the conclusive third Delphi round, all behavioral indicators were successfully validated. With 11 experts involved in the third round, the CVI reached 0.78, indicating a substantial level of consensus. This third round led to consensus on 3 sub-competencies and their respective behavioral indicators: *problem definition (1.1.2), setting priorities (3.2.3), and learning from experience and others (3.5.2)*. For the sub-competency *analyzing the context* (1.1.3), reaching consensus proved more challenging. Nonetheless, consensus was achieved regarding relevance and acceptability, with a CVI of 0.71 for comprehensibility, which is considered acceptable. The median score of 5 reflects a comprehension rating above 4, and 63.6% of experts ranked comprehensibility in the first tertile, demonstrating reasonable validity despite the difficulty in achieving full agreement.

The resulting validated CII-CARE framework, specifically tailored to support and foster intrapreneurial and innovative behavior among healthcare professionals, consisted of 3 competency clusters, encompassing 15 competencies, 38 sub-competencies, and 150 behavioral indicators (Table 3).

## Discussion

This study aimed to develop and validate a competency framework to meet the need for specific, actionable competencies that foster innovative and intrapreneurial behaviors among healthcare professionals in the healthcare sector. The newly developed and validated Competency Framework for Innovation and Intrapreneurship in Healthcare (CII-CARE) is structured into three competency-clusters encompassing 15 competencies, 38 sub-competencies, and 150 behavioral indicators.

The development of the CII-CARE Framework was informed by a scoping review that identified key competencies associated with innovation and intrapreneurship in healthcare. While previous studies have described individual competencies—such as idea generation, opportunity exploration, overcoming obstacles, and stakeholder engagement—these were often presented in isolation or lacked clear behavioral translation (2,3,6,20). The CII-CARE Framework addresses this gap by clustering these competencies into three coherent domains and operationalizing them into 150 measurable behavioral indicators.

The backbones of the CII-CARE Framework are the competency clusters: ***ideas and opportunities*, *resources*, and *into action***. Each of these competency clusters is discussed individually in the discussion section, providing a detailed analysis of how they contribute to addressing challenges in healthcare, such as providing patient-centered care, improving healthcare professional satisfaction and retention, and optimizing organizational efficiency to tackle workforce shortages (4–6).

The *ideas and opportunities cluster* includes competencies such as opportunity recognition, creativity, vision development, valuing ideas, and ethical thinking. Research by Asurakkody and Shin (6) and Masood and Afsar (4) highlights that creative thinking and opportunity recognition are essential drivers of innovation in healthcare, benefiting both patient care and organizational effectiveness. Creativity drives innovation within healthcare organizations, making it a key competency for healthcare professionals and essential for organizational transformation (20). Additionally, the inclusion of ethical and sustainable thinking in an innovation process is vital for the long-term success of healthcare innovations (24,25). Furthermore, effective strategies for sustainable healthcare innovation involve interdisciplinary collaboration, comprehensive knowledge dissemination, and promoting sustainable practices within the healthcare system (2).

The *resources* competency cluster includes competencies such as self-awareness, self-efficacy, motivation, mobilizing others, and financial literacy. Self-efficacy, for example, drives innovative actions in healthcare by boosting healthcare professionals' confidence (26). The competency mobilizing others (colleagues, healthcare professionals) supports collaboration and helps in overcoming resistance to change (9), while financial literacy enables healthcare professionals to understand the economic impact of their innovations (4). Intrapreneurial self-efficacy is crucial for translating intentions into actions, suggesting that organizations should offer training to enhance competencies and confidence (27). Sustainable healthcare requires integrating these competencies to ensure ecological, economic, and socio-cultural viability (28).

The *into action* competency cluster includes key competencies such as taking initiative, planning, managing risk, collaborating, and learning from experience. These skills are essential for translating ideas into tangible results in healthcare. Healthcare professionals who demonstrate intrapreneurial and innovative behavior, often work in unpredictable environments, need to manage risks effectively and take proactive action (29). Design thinking supports challenging uncertainty by balancing creative ideation with practical implementation, promoting innovation through problem reframing and experimentation (30). Intrapreneurial traits like proactiveness and risk-taking drive sustainable innovation (31). Proactiveness involves taking initiative to improve processes and patient care, while risk-taking encourages healthcare professionals to experiment with new ideas, even in the face of uncertainty. Combining design thinking with agile management and teamwork enhances innovation by leveraging diverse perspectives and iterative learning. *Design thinking* is a user-centered, problem-solving approach that focuses on empathy, ideation, and prototyping to address real user needs. When paired with *agile management*, which prioritizes flexibility and continuous improvement through short, focused work cycles, it empowers teams to adapt and innovate quickly. *Design Sprints*, a time-boxed process within agile, use rapid prototyping and collaborative feedback to test and refine solutions, thereby improving service quality and fostering staff enthusiasm by actively involving them in the innovation process (5,30).

The CII-CARE Framework has the potential to provide healthcare organizations with a comprehensive framework to evaluate and support the development intrapreneurial and innovative behaviour among healthcare organizations. By integrating this framework into training and continuous professional development initiatives, healthcare organizations are able to foster a culture of creativity, initiative, and calculated risk-taking, essential for enhancing healthcare quality and driving faster innovation (31). Although primarily designed as a quantitative tool, the framework can also be used for self-reflection, feedback conversations, and identifying growth areas at the individual or team level. The implementation and use of this framework have the potential to create an empowering environment that encourages healthcare professionals to solve problems creatively, thereby improving patient outcomes, operational efficiency, and job satisfaction (32,33). Additionally, the CII-CARE framework might serve as a tool for formal certification and accreditation, recognizing valuable innovative and intrapreneurial competencies. This recognition not only boosts professional engagement and motivation but also supports ongoing growth and innovation across the organization (26).

Future research should prioritize longitudinal studies to assess the practical and long-term effectiveness of the CII-CARE framework, particularly examining how the included competencies contribute to improved healthcare outcomes. In addition, validation studies focusing on construct and criterion validity are essential to further strengthen the credibility and applicability of the framework. Investigating the framework’s applicability across healthcare systems beyond Flanders would also be valuable, particularly to understand how cultural and organizational factors influence the perception and implementation of innovative and intrapreneurial competencies. Finally, exploring how the CII-CARE Framework can be integrated into continuous professional development initiatives could provide insights into its impact on healthcare professionals’ well-being, job satisfaction, and engagement.

One of the strengths of this study lies in eth adoption of a mixed-methods approach to validate the CII-CARE competency framework (16,17). The integration of the Nominal Group Technique and the Delphi methodology enhanced the rigor and credibility of the findings, while quantitative results and thematic insights informed the iterative refinement of the competency framework, ensuring robust consensus and the incorporation of all significant perspectives into the final version (21). Through iterative feedback rounds, a high level of consensus was achieved regarding the three competency clusters, (sub)competencies, and behavioral indicators. The CII-CARE Framework was developed and validated in collaboration with healthcare professionals from various sectors, including residential elderly care, hospitals, and primary care. This broad involvement across care levels ensures that the framework reflects the diversity and complexity of real-world healthcare settings. As such, the framework is intended for use across the wider healthcare context. Nevertheless, further research may be needed to explore its applicability in other healthcare systems or cultural contexts outside Flanders. To further refine the clarity and usability of the indicators in practice, a pilot study employing the think-aloud method with healthcare professionals is planned.

However, there are limitations to consider. First, the relatively small expert group could restrict the representativeness of the competency clusters, the (sub)competencies and behavioral indicators. While 36 experts were invited to participate, only 12 participated in the full process, and the reasons for non-participation remain unclear. The variation in participation across the feedback rounds may have led to inconsistencies, which could impact the robustness of certain results. Second, the changing composition of the expert panel in each round might have introduced variability in feedback, potentially affecting the reliability of the consensus achieved. A third limitation is related to the contextual applicability of the findings. As the study was conducted in Flanders, Belgium, the generalizability of the framework to other countries with different cultures and healthcare systems may be limited. Fourth, although the exploratory literature review provided valuable conceptual insights to inform the initial framework development, it did not follow the methodological rigor of a formal scoping review. This approach was chosen to align with the study’s developmental focus and practical constraints. Finally, the survey instrument was not piloted prior to distribution. Although its items were derived from a validated competency framework, pre-testing could have enhanced item clarity and perceived relevance. Future research could address this by including a larger and more culturally diverse group of experts to enhance the framework’s adaptability across different healthcare contexts. There were also terminological challenges, particularly regarding the concepts of *entrepreneurship* and *intrapreneurship*. As this framework targets intrapreneurial and innovative behavior specifically within healthcare, some participants may have found these distinctions challenging, despite the clarifications provided. This issue is particularly relevant in Dutch, where a single term often encompasses both *entrepreneurship* and *intrapreneurship*.

## Conclusions

The aim of this study was to develop and validate a comprehensive competency framework with specific competencies to support intrapreneurial and innovative behavior among healthcare professionals. The focus was on behaviors that foster innovation and improvement within healthcare organizations, emphasizing competencies used by professionals to drive change and improvement in their own healthcare organization.The CII-CARE framework offers a structured foundation for targeted continuous professional development programs, enabling healthcare organizations to build a culture that supports continuous improvement and innovation. By adopting the CII-CARE Framework, healthcare organizations may be better equipped to address emerging challenges while potentially achieving positive outcomes: improved treatment strategies and quality of care for patients, enhanced job satisfaction, reduced turnover, and continuous professional development for healthcare professionals.

## List of abbreviations

**CII-CARE** - Competence Framework for Innovation and Intrapreneurship in Healthcare

**CVI** - Content Validity Index

**NGT** - Nominal Group Technique (listed again in context of methodological approach)

**ACCORD** - ACcurate COnsensus Reporting Document

## Declarations

### Ethics approval and consent to participate

The Ethical Committee of Ghent University Hospital, in association with Artevelde University of Applied Sciences (Ghent, Belgium), reviewed this study and determined that, according to the principles of the Declaration of Helsinki, a formal ethics application was not required for this research [31].

Prior to participation, all experts received an informed consent form outlining the study's purpose and participant expectations. It was made clear that participation was voluntary, with the right to decline or withdraw at any time without consequence. The study posed no risks or costs to participants, and confidentiality was rigorously maintained. All data collected were anonymized to ensure participant privacy throughout the research process.

### Consent for publication

Not applicable

### Available data and materials

The datasets used and/or analyzed during the current study are available from the corresponding author on reasonable request.

### Competing interests

The authors declare that they have no competing interests

### Funding

The research was conducted as part of the employment of the authors within Artevelde University of Applied Sciences and without specific external funding.

### Authors’ contributions

**N.D. (Nele De Roo):** Conducted the scoping literature review, co-developed the first draft of the CII-CARE Framework, managed data collection and analysis throughout the Delphi and Nominal Group Technique sessions, and contributed to reviewing and editing the manuscript for publication.

**M.E. (Mieke Embo):** Provided strategic oversight and contributed to refining the study methodology, offering feedback on the framework’s development stages and ensuring alignment with the study’s objectives. M.E. also contributed to revising the manuscript for final publication.

**S.N. (Sabrina Nachtergaele):** Acted as the lead researcher, coordinated the study design, led the expert panel recruitment and facilitation, managed the Nominal Group Technique discussions, and provided guidance in refining each iteration of the framework. S.N. also handled correspondence with participants.

**T.S. (Tom Stevens):** Contributed to the initial design and adaptation of the EntreComp framework into the CII-CARE Framework, participated in drafting the first version, and actively reviewed and revised competence framework during each Delphi round.

### Acknowledgements

Not applicable

## References

1. WHO. World Health Organization. 2021. Global strategic directions for nursing and midwifery. .

2. Zuber CD, Moody L. Creativity and Innovation in Health Care. Nurs Adm Q. 2018 Jan;42(1):62–75.

3. Zuber C, Weberg D. Frameworks for Leading Frontline Innovation in Health Care: Nurse Lead. 2020 Jun;18(3):290–5.

4. Masood M, Afsar B. Transformational leadership and innovative work behavior among nursing staff. Nurs Inq. 2017 Oct;24(4):e12188.

5. Eines TF, Vatne S. Nurses and nurse assistants’ experiences with using a design thinking approach to innovation in a nursing home. J Nurs Manag [Internet]. 2018 May;26(4):425–31. Available from: https://onlinelibrary.wiley.com/doi/10.1111/jonm.12559

6. Asurakkody TA, Shin SY. Innovative Behavior in Nursing Context: A Concept Analysis. Asian Nurs Res (Korean Soc Nurs Sci). 2018 Dec;12(4):237–44.

7. Bacigalupo Margherita, Kampylis Panagiotis, Punie Yves, Brande GV den., European Commission. Joint Research Centre. EntreComp : the entrepreneurship competence framework. Publications Office; 2016.

8. Jakobsen L, Wacher Qvistgaard L, Trettin B, Juel Rothmann M. Entrepreneurship and nurse entrepreneurs lead the way to the development of nurses’ role and professional identity in clinical practice: A qualitative study. J Adv Nurs. 2021 Oct 1;77(10):4142–55.

9. Boore J, Porter S. Education for entrepreneurship in nursing. Nurse Educ Today. 2011 Feb;31(2):184–91.

10. Marques CS, Valente S, Lages M. The influence of personal and organisational factors on entrepreneurship intention: An application in the health care sector. J Nurs Manag. 2018 Sep;26(6):696–706.

11. Janssens O, Embo M, Valcke M, Haerens L. An online Delphi study to investigate the completeness of the CanMEDS Roles and the relevance, formulation, and measurability of their key competencies within eight healthcare disciplines in Flanders. BMC Med Educ [Internet]. 2022 Dec 10;22(1):260. Available from: https://bmcmededuc.biomedcentral.com/articles/10.1186/s12909-022-03308-8

12. Batt AM, Tavares W, Williams B. The development of competency frameworks in healthcare professions: a scoping review. Vol. 25, Advances in Health Sciences Education. Springer; 2020. p. 913–87.

13. European Union. https://europa.eu/europass/en/european-qualifications-framework-eqf. 2017. European Qualifications Framework (EQF) .

14. Slåtten T, Mutonyi BR, Lien G. The impact of individual creativity, psychological capital, and leadership autonomy support on hospital employees’ innovative behaviour. BMC Health Serv Res. 2020 Dec 1;20(1).

15. Gattrell WT, Logullo P, van Zuuren EJ, Price A, Hughes EL, Blazey P, et al. ACCORD (ACcurate COnsensus Reporting Document): A reporting guideline for consensus methods in biomedicine developed via a modified Delphi. PLoS Med. 2024 Jan 23;21(1):e1004326.

16. Foth T, Efstathiou N, Vanderspank-Wright B, Ufholz LA, Dütthorn N, Zimansky M, et al. The use of Delphi and Nominal Group Technique in nursing education: A review. Int J Nurs Stud. 2016 Aug;60:112–20.

17. Humphrey-Murto S, Varpio L, Wood TJ, Gonsalves C, Ufholz LA, Mascioli K, et al. The Use of the Delphi and Other Consensus Group Methods in Medical Education Research: A Review. Vol. 92, Academic Medicine. Lippincott Williams and Wilkins; 2017. p. 1491–8.

18. Murphy MK, Sanderson C, Black NA, Askham J, Lamping DL, Marteau T, et al. Consensus development methods, and their use in clinical guideline development [Internet]. Vol. 2, HTA Health Technology Assessment NHS R&D HTA Programme Health Technology Assessment. 1998. Available from: www.hta.ac.uk/htacd.htm

19. Green PL, Plsek PE. Coaching and Leadership for the Diffusion of Innovation in Health Care: A Different Type of Multi-Organization Improvement Collaborative. Jt Comm J Qual Improv. 2002 Feb;28(2):55–71.

20. Snow F. Creativity and Innovation. Nurs Adm Q. 2019 Oct;43(4):306–12.

21. Hasson F, Keeney S, McKenna H. Research guidelines for the Delphi survey technique. J Adv Nurs. 2000 Oct 28;32(4):1008–15.

22. Lynn MR. Determination and Quantification of Content Validity. Nurs Res. 1986 Nov;35(6):382–6.

23. Byrne D. A worked example of Braun and Clarke’s approach to reflexive thematic analysis. Qual Quant. 2022 Jun 1;56(3):1391–412.

24. Brand G, Collins J, Bedi G, Bonnamy J, Barbour L, Ilangakoon C, et al. “I teach it because it is the biggest threat to health”: Integrating sustainable healthcare into health professions education. Med Teach. 2021;43(3):325–33.

25. Ogiemwonyi O, Alam MN, Hago IE, Azizan NA, Hashim F, Hossain MS. Green innovation behaviour: Impact of industry 4.0 and open innovation. Vol. 9, Heliyon. Elsevier Ltd; 2023.

26. Antoncic B, Hisrich RD. Clarifying the intrapreneurship concept. Journal of Small Business and Enterprise Development. 2003 Mar 1;10(1):7–24.

27. Chouchane R, Fernet C, Austin S, Karoui Zouaoui S. Organizational support and intrapreneurial behavior: On the role of employees’ intrapreneurial intention and self-efficacy. Journal of Management and Organization. 2023 Mar 1;29(2):366–82.

28. Hunt RA, Lerner DA. Sustainable Human Healthcare: the centrality of nurses. Sustainable Healthcare and Intrapreneurial Nurses. 2020;

29. Scott SG, Bruce RA. Determinants of Innovative Behavior: A Path Model of Individual Innovation in the Workplace. Vol. 37, Source: The Academy of Management Journal. 1994.

30. Valentine L, Kroll T, Bruce F, Lim C, Mountain R. Design Thinking for Social Innovation in Health Care. Design Journal. 2017 Nov 2;20(6):755–74.

31. Huang LY, Yang Lin SM, Hsieh YJ. Cultivation of Intrapreneurship: A Framework and Challenges. Vol. 12, Frontiers in Psychology. Frontiers Media S.A.; 2021.

32. Day-Duro E, Lubitsh G, Smith G. Understanding and investing in healthcare innovation and collaboration. J Health Organ Manag. 2020 Jun 9;34(4):469–87.

33. Andersson T, Linnéusson G, Holmén M, Kjellsdotter A. Nurturing innovative culture in a healthcare organisation – Lessons from a Swedish case study. J Health Organ Manag. 2022;37(9):17–33.

Table Analyses Delphi Method

| **CLUSTER 1**  **1.IDEAS AND OPPORTUNITIES** |  | **Delphi 1** | | | **Delphi 2** | | | **Delphi 3** | | |
| --- | --- | --- | --- | --- | --- | --- | --- | --- | --- | --- |
|  | Relevance | Comprehensibility | Accessibility | Relevance | Comprehensibility | Accessibility | Relevance | Comprehensibility | Accessibility |
| **1.1.Spotting opportunities (1.1)** | | | | | | | | | | |
| 1.1.1.Identifying, creating, and spotting opportunities (1.1.1) | Median  CVI (%)  % in first tertile | 6  85,75%  71,45% | 4  85,75%  42,87% | 5  85,75%  85,75% |  |  |  |  |  |  |
| Problem definition (1.1.2) | Median  CVI (%)  % in first tertile | 5  71,45%  71,45% | 5  85,75%  57,16% | 5  85,75%  71,45% | 4  57,14%  42,92% | 4  57,14%  42,92% | 4  57,14%  42,92% | 6  90,9%  81,8% | 5  81,8%  72,7% | 6  90,9%  72,7% |
| Analyzing the context (1.1.3) | Median  CVI (%)  % in first tertile | 5  57,16%  57,16% | 4  85,75%  42,87% | 4  57,16%  57,16% | 4  57,14%  42,92% | 3  42,92%  42,92% | 3  42,92%  42,92% | 5  81,8%  72,7% | 5  72,7%  63,6% | 5  81,8%  63,6% |
| **Creativity (1.2)** | | | | | | | | | | |
| Being curious and open-minded (1.2.1) | Median  CVI (%)  % in first tertile | 5  85,75%  71,45% | 5  85,75%  57,16% | 5  85,75%  71,45% |  |  |  |  |  |  |
| Generating ideas (1.2.2) | Median  CVI (%)  % in first tertile | 6  85,75%  71,45% | 5  85,75%  57,16% | 5  85,75%  57,16% |  |  |  |  |  |  |
| Understanding the value of prototypes (1.2.3) | Median  CVI (%)  % in first tertile | 6  85,75%  57,16% | 5  85,75%  57,16% | 5  85,75%  57,16% |  |  |  |  |  |  |
| Being innovative (1.3.4) | Median  CVI (%)  % in first tertile | 5  100%  57,16% | 4  100%  42,87% | 4  100  42,87% |  |  |  |  |  |  |
| **Vision (1.3)** | | | | | | | | | | |
| Using imagination (1.3.1) | Median  CVI (%)  % in first tertile | 6  85,75%  85,75% | 5  85,75%  57,16% | 5  71,45%  71,45% | 5  85,75%  71,45% | 5  85,75%  71,45% | 5  85,75%  71,45% |  |  |  |
| Strategic thinking (1.3.2) | Median  CVI (%)  % in first tertile | 6  85,75%  71,45% | 5  71,45%  57,16% | 5  85,75%  57,16% | 5  85,75%  71,45% | 5  85,75%  71,45% | 5  85,75%  71,4% |  |  |  |
| **Valuing ideas (1.4)** | | | | | | | | | | |
| Valuing ideas (1.4.1) | Median  CVI (%)  % in first tertile | 6  85,75%  85,75% | 5  85,75%  57,16% | 5  85,75%  57,16% |  |  |  |  |  |  |
| **Ethical and sustainable thinking (1.5)** | | | | | | | | | | |
| Ethical behavior (1.5.1) | Median  CVI (%)  % in first tertile | 5  85,75%  85,75% | 5  57,16%  57,16% | 5  71,45%  51,16% | 5  85,75%  71,45% | 5  100  71,45% | 5  100  71,45% |  |  |  |
| Thinking sustainably (1.5.2) | Median  CVI (%)  % in first tertile | 5  100%  85,75% | 5  100%  57,16% | 5  100%  57,16% |  |  |  |  |  |  |
| Evaluating the impact (1.5.3) | Median  CVI (%)  % in first tertile | 6  85,75%  85,75% | 5  85,75%  71,45% | 5  85,75%  85,75% |  |  |  |  |  |  |
| **CLUSTER 2**  **( RESOURCES** |  | **Delphi 1** | | | **Delphi 2** | | | **Delphi 3** | | |
|  | Relevance | Comprehensibility | Accessibility | Relevance | Comprehensibility | Accessibility | Relevance | Comprehensibility | Accessibility |
| **5. Self-awareness and self-efficacy** | | | | | | | | | | |
| Identifying strengths and growth areas (2.1.1) | Median  CVI (%)  % in first tertile | 6  85,75%  85,75% | 5  85,75%  57,16% | 5  85,75%  85,75% |  |  |  |  |  |  |
| Belief in oneself (2.1.2) | Median  CVI (%)  % in first tertile | 6  85,75%  85,75% | 5  71,45%  57,16% | 5  85,75%  57,16% | 5  100%  71,45% | 5  100  57,16% | 5  100  71,45% |  |  |  |
| Shaping your future and following your expectations (2.1.3) | Median  CVI (%)  % in first tertile | 5  85,75%  85,75% | 5  85,75%  57,16% | 5  85,75%  85,75% |  |  |  |  |  |  |
| **Motivation and perseverance (2.2)** | | | | | | | | | | |
| Staying motivated and focusing on what drives you (2.2.1) | Median  CVI (%)  % in first tertile | 5  85,75%  85,75% | 5  85,75%  71,45% | 5  85,75%  71,45% |  |  |  |  |  |  |
| Being resilient and persevering (2.2.2) | Median  CVI (%)  % in first tertile | 6  85,75%  85,75% | 5  85,75%  85,75% | 5  85,75%  85,75% |  |  |  |  |  |  |
| **Financial and economic literacy (2.3)** | | | | | | | | | | |
| Managing budgets (2.3.1) | Median  CVI (%)  % in first tertile | 6  85,75%  71,45% | 5  85,75%  71,45% | 5  85,75%  85,75% | 5  100%  85,75% | 5  100%  85,75% | 6  100%  85,75% |  |  |  |
| Fundraising (2.3.2) | Median  CVI (%)  % in first tertile | 4  71,45%  42,87% | 5  85,75%  57,16% | 5  85,75%  85,75% |  |  |  |  |  |  |
| Acquiring legal knowledge (2.3.3) | Median  CVI (%)  % in first tertile | 3  28,58%  28,58% | 3  42,87%  42,87% | 4  57,16%  42,87% |  |  |  |  |  |  |
| **Mobilising others (2.4)** | | | | | | | | | | |
| Inspiring and persuading (2.4.1) | Median  CVI (%)  % in first tertile | 6  71,45%  57,16% | 4  71,45%  42,87% | 6  71,45%  57,16% | 5  85,75%  57,16% | 5  85,75%  57,16% | 5  85,75%  57,16% |  |  |  |
| Effectively communicating and using relevant media (2.4.2) | Median  CVI (%)  % in first tertile | 5  71,45%  57,16% | 4  71,45%  28,58% | 4  71,45%  42,87% | 5  100%  57,16% | 5  100%  57,16% | 5  100%  57,16% |  |  |  |
| **CLUSTER 3**  **INTO ACTION** |  | **Delphi 1** | | | **Delphi 2** | | | **Delphi 3** | | |
|  | Relevance | Comprehensibility | Accessibility | Relevance | Comprehensibility | Accessibility | Relevance | Comprehensibility | Accessibility |
| **Taking the initiative (3.1)** | | | | | | | | | | |
| Taking responsibility (3.1.1) | Median  CVI (%)  % in first tertile | 6  85,75%  71,45% | 5  85,75%  57,16% | 5  85,75%  71,45% |  |  |  |  |  |  |
| Acting proactively (3.1.2) | Median  CVI (%)  % in first tertile | 6  85,75%  71,45% | 5  85,75%  71,45% | 5  85,75%  71,45% |  |  |  |  |  |  |
| **Planning and management (3.2)** | | | | | | | | | | |
| Setting goals (3.2.1) | Median  CVI (%)  % in first tertile | 6  85,75%  85,75% | 5  85,75%  85,75% | 5  85,75%  85,75% |  |  |  |  |  |  |
| Working systematically (3.2.2) | Median  CVI (%)  % in first tertile | 6  85,75%  85,75% | 4  85,75%  42,87% | 5  85,75%  57,16% |  |  |  |  |  |  |
| Setting priorities (3.2.3) | Median  CVI (%)  % in first tertile | 5  71,45%  57,16% | 4  71,45%  28,58% | 4  71,45%  42,87% | 5  71,45%  57,16% | 5  57,16%  57,16% | 5  57,16%  57,16% | 5  90,9%  90,9% | 5  81,8%  72,7% | 5  90,9%  81,8% |
| Dealing with resistance (3.2.4) | Median  CVI (%)  % in first tertile | 6  71,45%  71,45% | 4  71,45%  42,87% | 5  71,45%  71,45% | 5  85,75%  85,75% | 5  85,75%  85,75% | 6  85,75%  85,75% |  |  |  |
| Implementing value-creating activities (3.2.5) | Median  CVI (%)  % in first tertile | 5  85,75%  71,45% | 5  85,75%  42,87% | 5  85,75%  57,16% |  |  |  |  |  |  |
| **Coping with ambiguity, uncertainty and risk (3.3)** | | | | | | | | | | |
| Dealing with uncertainty and ambiguity (3.3.1) | Median  CVI (%)  % in first tertile | 5  85,75%  57,16% | 5  85,75%  57,16% | 5  85,75%  71,45% |  |  |  |  |  |  |
| Risk management (3.3.2) | Median  CVI (%)  % in first tertile | 6  85,75%  85,75% | 5  85,75%  71,45% | 5  85,75%  85,75% |  |  |  |  |  |  |
| **Working with others (3.4)** | | | | | | | | | | |
| Accepting diversity (3.4.1) | Median  CVI (%)  % in first tertile | 5  85,75%  71,45% | 5  71,45%  57,16% | 5  85,75%  57,16% | 6  100%  85,75% | 5  100%  42,92% | 6  100%  57,14% |  |  |  |
| Active listening and developing emotional intelligence (3.4.2) | Median  CVI (%)  % in first tertile | 6  85,75%  85,75% | 5  85,75%  57,16% | 5  85,75%  71,45% |  |  |  |  |  |  |
| Collaboration (3.4.3) | Median  CVI (%)  % in first tertile | 6  85,75%  71,45% | 5  85,75%  71,45% | 5  85,75%  71,45% |  |  |  |  |  |  |
| Giving and receiving feedback (3.4.4) | Median  CVI (%)  % in first tertile | 6  85,75%  85,75% | 5  85,75%  71,45% | 6  85,75%  85,75% |  |  |  |  |  |  |
| Expanding networks (3.4.5) | Median  CVI (%)  % in first tertile | 6  85,75%  85,75% | 5  85,75%  71,45% | 5  85,75%  85,75% |  |  |  |  |  |  |
| **Learning through experience (3.5)** | | | | | | | | | | |
| Reflecting (3.5.1) | Median  CVI (%)  % in first tertile | 6  85,75%  71,45% | 5  85,75%  71,45% | 5  85,75%  71,45% |  |  |  |  |  |  |
| Learning from experience and others (3.5.2) | Median  CVI (%)  % in first tertile | 6  71,45%  71,45% | 5  71,45%  57,16% | 5  71,45%  71,45% | 5  85,75%  71,45% | 4  71,45%  42,92% | 5  85,75%  57,14% | 5  81,9%  81,9% | 5  81,9%  54,5% | 5  81,8%  72,7% |

**Column descriptions:**

- **Competency Clusters and (Sub)Competencies**: Groups and specific skills or attributes validated in the study.
- **Delphi Rounds (1-3)**: Iterative feedback rounds conducted with expert participants.
- **Metrics**:
  - **Median**: The median score assigned by participants for the given metric on a 6-point Likert scale.
  - **CVI (%)**: Content Validity Index, representing the percentage agreement among participants on the metric's validity.
  - **% in First Tertile**: The percentage of participants who rated the metric in the top third of the Likert scale.

Table 3 Final version of the CII-CARE Framework

| Competency Cluster: (1) Ideas and opportunities | | |
| --- | --- | --- |
| **Competency** | **Sub-Competency** | **Behavioral indicators** |
| - 1. **Spotting opportunities** | (1.1.1) Identifying, creating and spotting opportunities | - Foundation: I recognize opportunities, needs, and challenges within my work environment. - Intermediate: I proactively seek out opportunities that create added value, redefine challenges, and determine who should be involved in addressing needs and challenges. - Advanced: I possess knowledge and understanding of my own work environment (and the potentially conflicting interests of the stakeholders involved) to seize opportunities at the right time. - Expert: I cluster various opportunities, identify the best ones, develop an action plan, and design projects that anticipate future needs. |
| (1.1.2) Problem Definition | - Foundation: I explore problems in different ways to generate multiple solutions. - Intermediate: I actively contribute to group processes to define problems. - Advanced: I encourage others to view problems from a different perspective. - Expert: I teach others creative techniques to view problems from an alternative perspective. |
| (1.1.3) Analyzing the context | - Foundation: I identify the key elements of the context in relation to opportunities, needs, and challenges within my work environment. - Intermediate: I analyze the context and recognize how opportunities, needs, and challenges lead to a value-creating activity* within my work environment. - Advanced: I define the boundaries of my work environment* and determine development opportunities for addressing the opportunities, needs, and challenges within it. - Expert: Using my contextual knowledge, I foster a work environment that is receptive to signals for change. |
| - 1. **Creativity** | (1.2.1) Being curious and open-minded | - Foundation: I explore new ways to utilize existing resources and enhance my knowledge. - Intermediate: I experiment with my skills and actively seek new solutions for my needs and those of my work environment. - Advanced: I actively search for new solutions to improve the value creation process. - Expert: I convey knowledge, ideas, and solutions in various ways, drawing from my understanding of different contexts. |
| (1.2.2) Generating ideas | - Foundation: I draw inspiration from the ideas of others and consider what they could mean for me. - Intermediate: I develop ideas (both independently and collaboratively) that create added value for my work environment. - Advanced: I experiment with various techniques to arrive at alternative solutions and test these ideas with end-users. - Expert: / |
| (1.2.3) Understanding the value of prototypes | - Foundation: I understand and improve existing ideas, services, products, and processes to better meet my needs and those of my work environment. - Intermediate: I identify, test, and refine the essential features my prototype must have to demonstrate its added value. - Advanced: I create (independently or collaboratively) ideas, services, products, and/or processes that solve my problems and generate added value. - Expert: I encourage others to create added value through new ideas, services, products, or processes. |
| (1.2.4) Being innovative | - Foundation: I describe and identify examples of innovations that have transformed my work environment. - Intermediate: I understand different types of innovations and become aware of whether an idea, product, or process is innovative or simply new to me. - Advanced: I describe various levels of innovation and their role in a value-creating activity, as well as how they spread within my work environment. - Expert: I encourage others to create added value through new ideas, services, products, or processes. |
| **(1.3) Vision** | (1.3.1) Using imagination | - Foundation: I develop simple future scenarios in which my work environment looks different or improved. - Intermediate: I use my imagination to envision future scenarios for my value-creating activity. - Advanced: I leverage my understanding of the context to devise various strategic visions* for my value-creating activity. - Expert: I demonstrate the benefits of my future scenarios to different target audiences. |
| (1.3.2) Strategic thinking | - Foundation: I understand what strategic thinking is, explain what a vision is, and its purpose. - Intermediate: I know what is needed to build a vision and can link concrete examples from my work environment to it. - Advanced: I draft a vision statement for my value-creating activity based on a context analysis and the vision of my work environment, using it as a foundation for action. - Expert: I build on the established vision to define and achieve a strategy for my value-creating activity, engaging others in the process. |
| **(1.4) Valuing ideas** | (1.4.1) Valuing ideas | - Foundation: I understand the concept of 'added value' and recognize how others create added value for my work environment. - Intermediate: I differentiate between social, cultural, and economic added value. - Advanced: I recognize the impact and added value of my value-creating activity on social, cultural, and economic levels. - Expert: I present the value of a new idea from the perspective of various stakeholders. |
| **(1.5) Ethical and sustainable thinking** | (1.5.1) Ethical behavior | - Foundation: I understand ethical behavior, apply it in my daily actions, and take action against unethical behavior. - Intermediate: I am driven by ethical behavior when making decisions related to my value-creating activity. - Advanced: I ensure that ideas for a value-creating activity are supported by ethical behavior. - Expert: I take responsibility for promoting ethical behavior* within my sphere of influence. |
|  | (1.5.2) Thinking sustainably | - Foundation: I understand the concept of sustainability. - Intermediate: I identify practices that can promote sustainability in my work environment. - Advanced: I implement elements of sustainability in my value-creating activity. - Expert: I encourage consideration of sustainability in every new value-creating activity. |
|  | (1.5.3) Evaluating the impact | - Foundation: I recognize the impact of a value-creating activity within my work environment and identify the stakeholders involved. - Intermediate: I express the impact of my value-creating activity on myself, my work environment, the stakeholders, and the target audience. - Advanced: . I analyze the implications of my value-creating activity within the boundaries of my work environment and describe the purpose of impact assessment and monitoring. - Expert: I select metrics to track, assess, and evaluate the impact of my value-creating activity. |
| **Competency Cluster: (2) Resources** | | |
| **Competency** | **Sub-Competency** | **Behavioral indicators** |
| **(2.1) Self-awareness and self-efficacy** | (2.1.1) Identifying strengths and growth areas | - Foundation: I know my strengths and weaknesses. - Intermediate: I assess my weaknesses and areas for growth, as well as those of others, in relation to opportunities for creating added value. - Advanced: I collaborate with others to compensate for areas of growth and to amplify strengths. - Expert: I help others identify their strengths and areas for growth. |
| (2.1.2) Belief in oneself | - Foundation: I believe in my ability to achieve what I want. - Intermediate: I believe that I can positively influence people and situations. - Advanced: I believe in my capacity to extract value from experiences that others label as failures. - Expert: I believe in my ability to carry out what I have planned, despite obstacles, limited resources, and resistance from others. |
| (2.1.3) Shaping your future and following your expectations | - Foundation: I describe the qualities and skills needed for various job-related roles now and in the future, as well as the qualities and skills I possess. - Intermediate: I use my skills and qualities to identify opportunities within my role. - Advanced: I collaborate with my team and organization to select professional development opportunities based on a clear understanding of our strengths and areas for growth. - Expert: I design strategies to overcome weaknesses (whether mine, my organizations, or my team's) and develop our strengths by anticipating future needs. |
| **(2.2) Motivation and perseverance** | (2.2.1) Staying motivated and focusing on what drives you | - Foundation: I am motivated by the idea of creating value for myself and others. - Intermediate: I recognize the difference between personal and external factors that motivate me and others in value-creating activities. - Advanced: I coach and use strategies to keep myself and others motivated. - Expert: I devise effective ways to keep talented individuals inspired and motivated, thereby fostering a continuous cycle of improvement and innovation. |
| (2.2.2) Being resilient and persevering | - Foundation: I demonstrate passion, determination, and perseverance when striving to achieve my goals. - Intermediate: I am willing to fail and assess whether it is worthwhile to continue with a value-creating activity. - Advanced: I develop strategies to overcome unfavorable circumstances, persist through setbacks to achieve my goals, and celebrate short-term successes. - Expert: I inspire others to stay positive when making difficult decisions and dealing with failures. |
| **(2.3) Financial and economic literacy** | (2.3.1) Managing budgets | - Foundation: I responsibly create a simple budget for my value-creating activity. - Intermediate: I evaluate, in consultation with financial experts, the incoming and outgoing cash flows of a value-creating activity. - Advanced: I collaborate with financial experts to use financial indicators to assess the financial health of my value-creating activity. - Expert: I can develop a financially and economically sustainable long-term plan for my value-creating activity. |
| (2.3.2) Fundraising | - Foundation: I am aware of the existence of grant channels and funding sources for value-creating activities. - Intermediate: I identify, in consultation with a (financial) expert, the grant channels and funding sources that may be needed for the execution of my value-creating activity. - Advanced: I select, in consultation with a (financial) expert, the most suitable funding source for my value-creating activity. - Expert: I am capable of applying for funding through grant channels and funding sources in collaboration with an expert and know whom to approach within my organization for this purpose. |
| **(2.4) Mobilising others** | (2.4.1) Inspiring and persuading | - Foundation: I am enthusiastic and actively engaged in creating value for others, and I can persuade others with a range of arguments. - Intermediate: I do not get discouraged, lead by example, and persuade others by appealing to their emotions. - Advanced: I gain support and overcome resistance by pitching my value-creating activity. - Expert: I build a coalition with my team, partners, and stakeholders when faced with a challenging situation, negotiate, and achieve the desired change. |
| (2.4.2) Effectively communicating and using relevant media | - Foundation: I convey the value of my idea and that of my team convincingly to others using various methods and media. - Intermediate: I effectively communicate the value of my value-creating activity to stakeholders with diverse backgrounds, using appropriate media tailored to my target audience. - Advanced: I craft stories that motivate and inspire people in relation to my value-creating activity and collaborate with a communication expert to employ the appropriate communication strategy. - Expert: / |
| **Competency Cluster: (3) Into action** | | |
| **Competency** | **Sub-Competency** | **Behavioral indicators** |
| **(3.1) Taking the initiative** | (3.1.1) Taking responsibility | - Foundation: I take individual responsibility for the tasks assigned to me. - Intermediate: I voluntarily assume individual and group responsibility when carrying out simple tasks. - Advanced: I take responsibility for complex tasks, encourage others to take responsibility, and share accountability with them in my value-creating activity. - Expert: I take responsibility for complex tasks, seizing new opportunities, and foster initiative-taking among others within my value-creating activity. |
| (3.1.2) Acting proactively | - Foundation: I think in a structured way about possible solutions for simple problems affecting my work environment. - Intermediate: I actively address challenges, solve simple problems, and seize opportunities to create added value within my work environment. - Advanced: I undertake action, solve complex problems, and guide others in proactive behavior and developing solutions. - Expert: I encourage others to take initiative in problem-solving and proactively anticipate future trends and developments relevant to my work environment. |
| **(3.2) Planning and management** | (3.2.1) Setting goals | - Foundation: I identify relevant goals to create added value in my work environment. - Intermediate: I identify forward-looking goals aligned with my strengths, ambitions, interests, and achievements to create added value within my work environment. - Advanced: I establish short-, medium-, and long-term objectives that stem from my value-creating activity. - Expert: I design a strategy to achieve the goals of my value-creating activity. |
| (3.2.2) Working systematically | - Foundation: I execute a series of tasks and then check whether a task is progressing according to plan. - Intermediate: I understand the different components of an action plan and know what milestones and indicators are. - Advanced: I create an action plan outlining the necessary steps to achieve my goals and define milestones to track the progress of my value-creating activity. - Expert: I use the action plan to monitor the established indicators of my value-creating activity. |
| (3.2.3) Setting priorities | - Foundation: I recognize the steps required in a value-creating activity and understand the priorities within these steps. - Intermediate: I set priorities to achieve my value-creating activity within my work environment. - Advanced: I establish priorities to achieve my value-creating activity and adjust them based on contextual factors. - Expert: I encourage others to revise priorities in the process of realizing a value-creating activity. |
| (3.2.4) Dealing with resistance | - Foundation: I recognize resistance to change in myself and others within my work environment. - Intermediate: I understand the causes and underlying reasons for resistance and view it as an opportunity to optimize my value-creating activity. - Advanced: I conduct a resistance analysis and develop strategies to manage resistance in change processes. - Expert: I proactively seek out and perceive resistance as an opportunity to optimize my work environment. |
| (3.2.5) Implementing value-creating activities | - Foundation: I understand the different steps required to initiate change within my work environment. - Intermediate: I analyze the impact of the implementation within my work environment. - Advanced: I identify the key hindering and facilitating factors necessary to shape the implementation process. - Expert: I adjust implementation strategies based on measured indicators to successfully implement the value-creating activity. |
| **(3.3) Coping with ambiguity, uncertainty and risk** | (3.3.1) Dealing with uncertainty and ambiguity | - Foundation: I explore my own ways of achieving things and am not afraid to make mistakes when trying new things. - Intermediate: I seek out and compare various information sources to help reduce ambiguity, uncertainty, and risks when making decisions - Advanced: I integrate different perspectives to make informed decisions when the level of uncertainty is high. - Expert: I develop appropriate strategies for gathering and verifying data to assist in decision-making in uncertain and ambiguous situations. |
| (3.3.2) Risk management | - Foundation: I describe the risks associated with the simple value-creating activity I participate in. - Intermediate: I critically evaluate acceptable and unacceptable risks of an idea that creates value, taking various factors into account. - Advanced: I conduct a risk assessment and develop a risk management plan to guide my choices (or those of my team) in developing my value-creating activity. - Expert: I employ strategies to mitigate the risks that may arise during the value creation process. |
| **(3.4) Working with others** | (3.4.1) Accepting diversity | - Foundation: I am aware of diversity and show respect for others' values, norms, backgrounds, situations, and ways of thinking. - Intermediate: I recognize diversity as a potential source of ideas and opportunities. - Advanced: I actively leverage diversity in my search for ideas that create added value for my activity. - Expert: I encourage others to actively seek out diversity within my work environment. |
| (3.4.2) Active listening and developing emotional intelligence | - Foundation: I am open to involving others and discuss the benefits of listening to others' ideas to achieve my goals (or those of my team). - Intermediate: I listen to stakeholders' ideas to create value without showing bias. - Advanced: I implement strategies to actively listen to my end-users and act on their needs. - Expert: I gather information from various sources to understand the needs of my end-users. |
| (3.4.3) Collaboration | - Foundation: I am open to working both independently and with others, taking on different roles and responsibilities. - Intermediate: I share ownership of value-creating activities with my team members and contribute constructively to group decision-making. - Advanced: I assemble a team based on the individual knowledge, skills, and attitudes of each member, utilizing techniques and tools that facilitate collaboration. - Expert: I build an organization's capacity to create value by encouraging people to collaborate and inspiring them to work independently together on a value-creating activity. |
| (3.4.4) Giving and receiving feedback | - Foundation: I recognize the importance of feedback in a professional context and am aware of the purpose and benefits of giving and receiving feedback. - Intermediate: I possess basic feedback skills and provide constructive feedback in a respectful and empathetic manner. - Advanced: I possess coaching skills and use feedback to guide and support others in their professional growth and development. - Expert: I promote a feedback culture within my work environment, encourage open communication, and create a safe space for sharing feedback. |
| (3.4.5) Expanding networks | - Foundation: I establish new contacts and collaborate with others (individuals and groups). - Intermediate: I build new relationships to gain the support I need to turn ideas into action. - Advanced: I proactively reach out to the right people within and outside my organization to support my value-creating activity (or that of my team). - Expert: I design effective processes to build networks of diverse or new stakeholders and keep them engaged. |
| **(3.5) Learning through experience** | (3.5.1) Reflecting | - Foundation: I recognize that I learn through gaining experience and provide examples demonstrating how my competence has increased. - Intermediate: I evaluate whether and how I have achieved my goals, enabling me to assess my performance and learn from it. - Advanced: I help others reflect on their achievements, temporary failures, and successes by providing honest and constructive feedback. - Expert: I elevate my team or organization to a higher level of performance by utilizing collected feedback and learning from successes and failures. |
| (3.5.2) Learning from experience and from others | - Foundation: I recognize that I learn through gaining experience and provide examples demonstrating how my competence has increased. - Intermediate: I am constantly seeking opportunities to enhance my strengths and address my areas for improvement. - Advanced: I help others reflect on their interactions with others and support them in developing their strengths and addressing their areas for improvement. - Expert: I draw lessons from monitoring and evaluation processes and design a strategy to develop strengths and address areas for improvement within my work environment. |

Table 4 Glossary of terms of the CII-CARE Framework

| **Sustainability** | **Sustainability** refers to the ability of healthcare providers to deliver care that not only meets the current needs of patients but also considers the needs of future generations and the overall health of the environment. It involves striving for a balance between the three key pillars of sustainability: social responsibility, economic efficiency, and ecological aspects, with quality care as the primary focus. |
| --- | --- |
| **End-users** | **End-users**  refer to the individuals or groups who directly benefit from or are impacted by the innovations and changes that healthcare providers develop and implement in practice. Understanding the needs, preferences, and experiences of end-users is crucial for designing healthcare innovations that improve care quality and meet the expectations and demands of those receiving care. |
| **Ethical behavior** | **Ethical behavior** encompasses maintaining ethical standards and integrity while pursuing innovative practices and behaviors. This includes respecting patients' rights and dignity, promoting autonomy and self-determination, ensuring the confidentiality and privacy of patient data, preventing harm, avoiding conflicts of interest, and ensuring fair and equitable access to healthcare resources. Ethical behavior underpins responsible and sustainable innovations in healthcare. |
| **Prototype** | A **prototype** is an early version and/or initial model or representation of something being developed, aimed at testing concepts, further exploring ideas, and/or validating a design. Prototypes can vary in complexity and form. Their purpose is to gain insight into the feasibility, functionality, and usability of a concept. |
| **Stakeholders** | **Stakeholders** are individuals, groups, organizations, or communities that have a vested interest in, influence over, or are affected by the activities and innovations of healthcare providers. These include, among others, patients, families, healthcare colleagues, managers, medical professionals, healthcare institutions, regulatory bodies, insurers, and policymakers. Stakeholders play a crucial role in supporting, guiding, funding, evaluating, and influencing innovative behaviors and practice changes in healthcare. |
| **Designing a strategic vision** | **Designing a strategic vision** refers to healthcare providers' ability to develop a clear, long-term outlook on the future of healthcare and their role within it. This vision involves identifying opportunities, challenges, and trends in healthcare and formulating a strategic direction to promote innovation and improve the quality of care. |
| **Value-creating activities** | **Value-creating activities** refer to actions, processes, or efforts that directly or indirectly contribute to enhancing the healthcare experience and outcomes for patients while promoting efficiency and effectiveness. These activities add value to care delivery and processes, ranging from improving direct patient care to increasing efficiency and cost control, enhancing patient engagement, or fostering technological innovations in healthcare practice. |
| **Work environment** | The **work environment** refers to the physical facilities (buildings, equipment, technologies), social context (colleagues, supervisors, patients), and organizational structure (policies, procedures, financial resources) in which healthcare providers perform their tasks and responsibilities. |
